# Supplementary material for: Stormwater subsurface gravel wetland hydraulics, phosphorus retention, and chloride dynamics in cold climates
Source: Royal Society of Chemistry journal article supplement (doi:10.1039/d3ew00062a), 2023-01-01

## Stormwater subsurface gravel wetland hydraulics, phosphorus retention, and chloride dynamics in cold climates

Eric D. Roy,<sup>\*a,b,c</sup> Andres O. Torizzo,<sup>d</sup> Marcos L. Kubow,<sup>a</sup> Nisha C. Nadkarni,<sup>d</sup> Thomas M. Adler,<sup>d</sup> Madeline F. Yandow,<sup>d</sup> Finn A. Bondeson,<sup>b</sup> Adrian R.H. Wiegman,<sup>ac</sup> and Donna M. Rizzo<sup>b,c</sup>

---

<sup>a</sup> Rubenstein School of Environment & Natural Resources, University of Vermont, Burlington, VT, USA 05405. Email: [eroy4@uvm.edu](mailto:eroy4@uvm.edu)

<sup>b</sup> Department of Civil & Environmental Engineering, University of Vermont, Burlington, VT, USA 05405

<sup>c</sup> Gund Institute for Environment, University of Vermont, Burlington, VT, USA 05405

<sup>d</sup> Watershed Consulting Associates LLC, Burlington, VT, USA 05401

## SUPPLEMENTARY MATERIALS

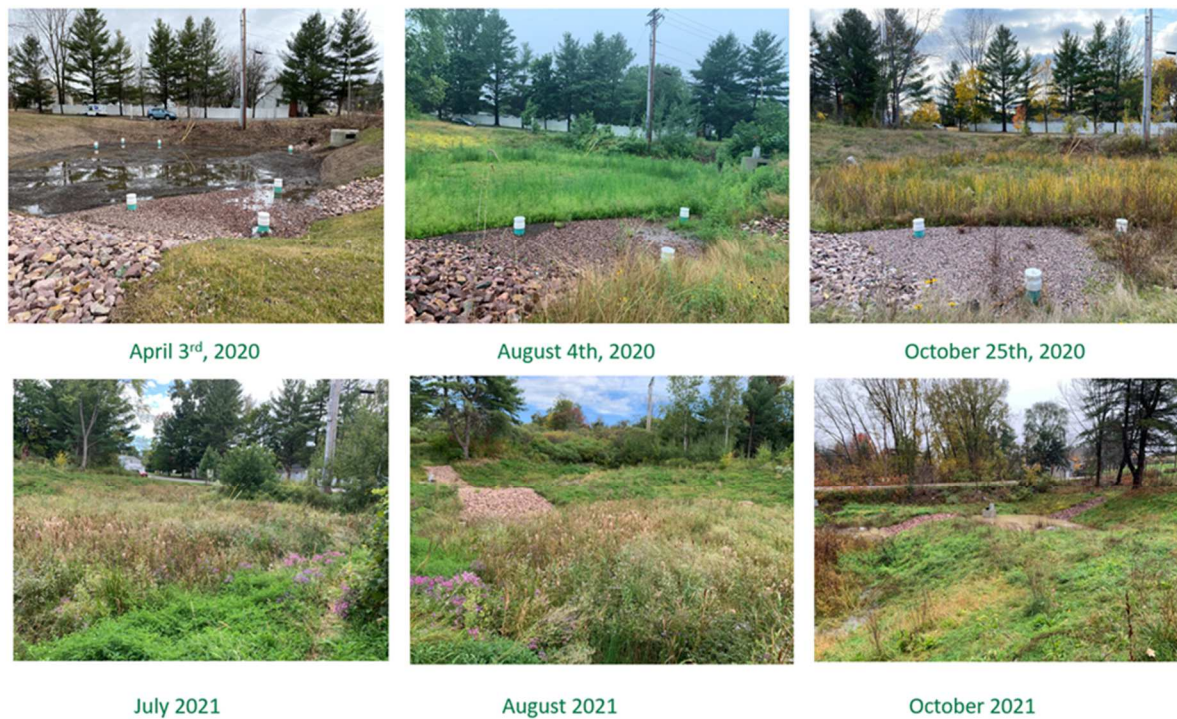

**Figure S1.** Fairview Drive SGW over time. Year 1 photos are on the top, and Year 2, 2021, on the bottom.

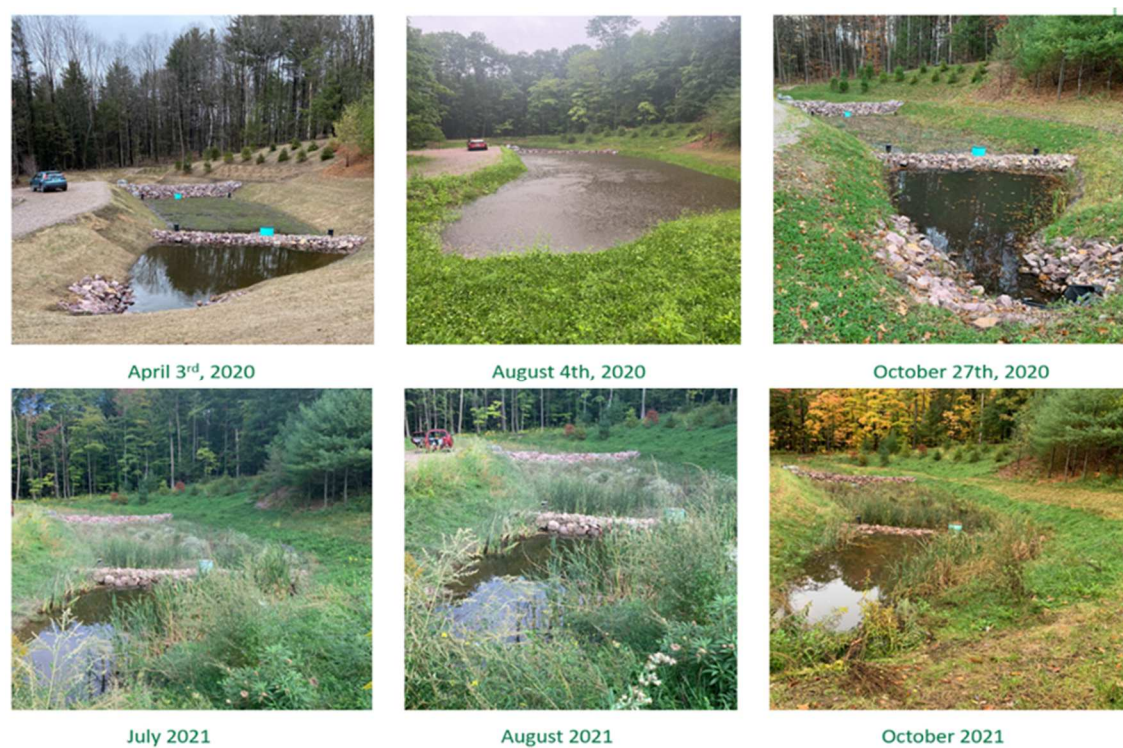

**Figure S2.** Kennedy Drive SGW over time. Year 1 photos are on the top, and Year 2, 2021, on the bottom.

**Table S1.** Rainfall and flow volumes for the storm events monitored in this study.

| Site     | Date          | Rainfall (cm) | Inlet volume (m <sup>3</sup> ) |          | Outlet volume (m <sup>3</sup> ) |
|----------|---------------|---------------|--------------------------------|----------|---------------------------------|
|          |               |               | Measured                       | Modelled | Measured                        |
| Fairview | June 25, 2020 | 0.66          | 69.0                           | 3.7      | 0                               |
| Fairview | Aug 5, 2020   | 5.16          | 1626.5                         | 1793.5   | 959.4                           |
| Fairview | Oct 1, 2020   | 4.75          | 991.1                          | 1548.0   | 741.2                           |
| Fairview | Oct 8, 2020   | 1.35          | 365.7                          | 56.7     | 99.0                            |
| Fairview | Oct 13, 2020  | 0.56          | 60.8                           | 2.5      | 1.2                             |
| Fairview | Oct 22, 2020  | 1.19          | 237.5                          | 33.3     | 187.6                           |
| Fairview | July 19, 2021 | 4.90          | 750.2                          | 1638.1   | 180.5                           |
| Fairview | July 22, 2021 | 3.45          | 870.7                          | 848.6    | 518.8                           |
| Fairview | July 30, 2021 | 0.46          | 272.5                          | 2.5      | 0                               |
| Fairview | Aug 2, 2021   | 2.54          | 584.3                          | 457.6    | 141.7                           |
| Fairview | Aug 20, 2021  | 2.06          | 442.3                          | 257.8    | 87.9                            |
| Fairview | Oct 27, 2021  | 2.24          | 566.4                          | 325.6    | 228.7                           |
| Kennedy  | July 10, 2020 | 0.71          | 39.2                           | 80.2     | 55.6                            |
| Kennedy  | July 12, 2020 | 0.79          | 76.4                           | 97.4     | 58.8                            |
| Kennedy  | July 17, 2020 | 0.51          | 43.2                           | 38.2     | 53.0                            |
| Kennedy  | July 24, 2020 | 0.81          | 91.8                           | 103.6    | 56.7                            |
| Kennedy  | Aug 5, 2020   | 6.20          | 1268.2                         | 1391.4   | 1057.0                          |
| Kennedy  | Aug 26, 2020  | 0.81          | 124.3                          | 103.6    | 85.8                            |
| Kennedy  | Aug 29, 2020  | 1.52          | 300.6                          | 301.0    | 279.1                           |
| Kennedy  | Sept 14, 2020 | 0.53          | 34.8                           | 41.9     | 35.3                            |
| Kennedy  | Oct 1, 2020   | 5.49          | 1136.5                         | 1216.2   | 1001.0                          |
| Kennedy  | Oct 8, 2020   | 0.74          | 103.5                          | 85.1     | 94.0                            |
| Kennedy  | Oct 16, 2020  | 2.18          | 488.9                          | 507.0    | 363.8                           |
| Kennedy  | Oct 22, 2020  | 1.19          | 182.2                          | 204.8    | 114.5                           |
| Kennedy  | July 9, 2021  | 1.24          | 292.1                          | 219.6    | 98.5                            |
| Kennedy  | July 19, 2021 | 5.69          | 938.2                          | 1265.5   | 865.7                           |
| Kennedy  | July 22, 2021 | 2.46          | 623.3                          | 597.0    | 531.7                           |
| Kennedy  | July 30, 2021 | 1.91          | 317.6                          | 418.1    | 297.2                           |
| Kennedy  | Aug 2, 2021   | 1.80          | 393.9                          | 387.3    | 366.1                           |
| Kennedy  | Aug 20, 2021  | 3.07          | 540.4                          | 626.6    | 531.3                           |
| Kennedy  | Sept 10, 2021 | 3.23          | 669.7                          | 663.6    | 657.8                           |
| Kennedy  | Sept 24, 2021 | 2.59          | 521.2                          | 509.4    | 429.1                           |

## Seed Mixes used at Both Field Sites:

### Wet Meadow & Detention Basin Mix:

*Elymus virginicus* (Virginia wildrye)  
*Panicum virgatum* (Switchgrass)  
*Festuca rubra* (Creeping red fescue)  
*Carex vulpinoidea* (Fox sedge)  
*Verbena hastata* (Blue vervain)  
*Scirpus cyperinus* (Woolgrass)  
*Onoclea sensibilis* (Sensitive fern)  
*Bidens cernua* (Nodding bur marigold)  
*Eutrochium maculatum* (Joe-pye weed)  
*Juncus effusus* (Soft rush)  
*Symphyotrichum nova-angliae* (New England aster)

### Swamp, Bog, and Marsh Mix:

*Sparganium eurycarpum* (Broadfruited bur-reed)  
*Pontederia cordata* (Pickerelweed)  
*Verbena hastata* (Blue vervain)  
*Schoenoplectus tabernaemontani* (Softstem bulrush)  
*Alisma subcordatum* (Northern water plantain)  
*Eutrochium maculatum* (Joe-pye weed)  
*Scirpus atrovirens* (Green bulrush)  
*Asclepias incarnata* (Swamp milkweed)  
*Carex lurida* (Shallow sedge)  
*Iris versicolor* (Blueflag iris)  
*Acorus americanus* (Sweetflag)  
*Carex vulpinoidea* (Fox sedge)  
*Eupatorium perfoliatum* (Boneset)  
*Sagittaria latifolia* (Broadleaf arrowhead)

Next 32 Pages: Hydrographs from storms monitored during the field study

# Storm 1

Fairview Drive Wetland

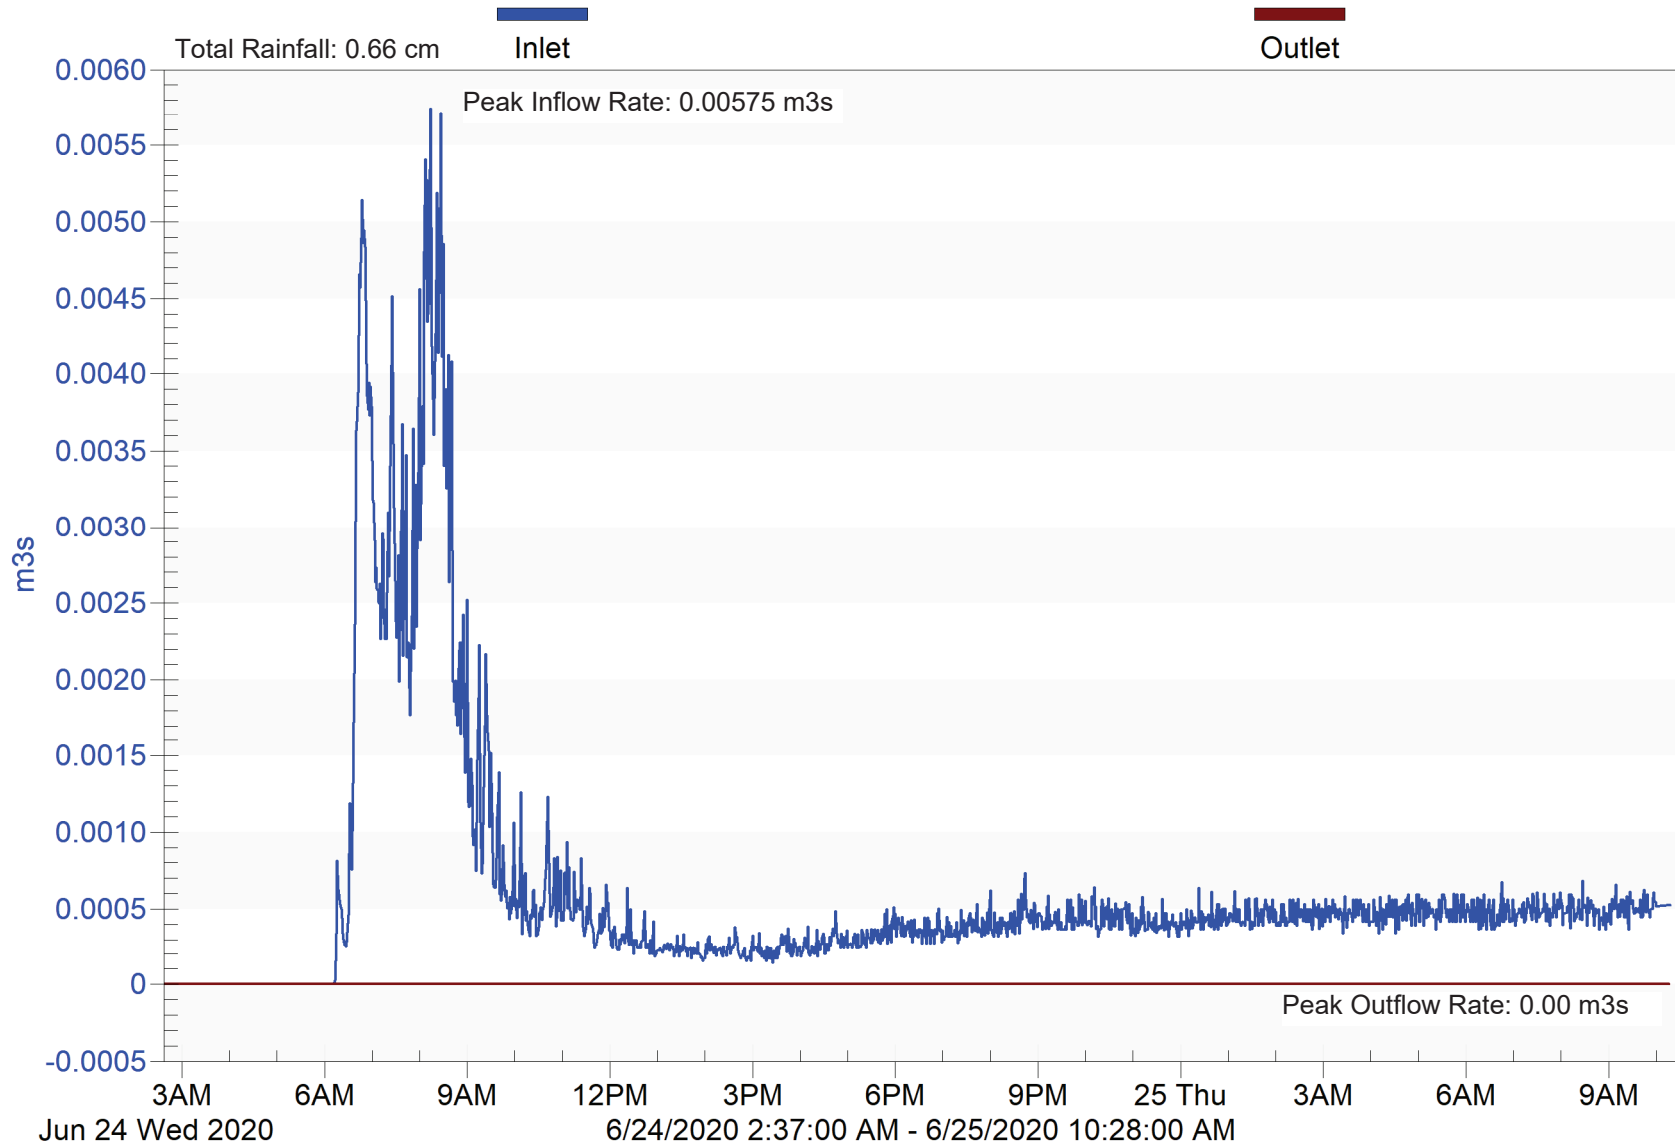

# Storm 6

Fairview Drive Wetland

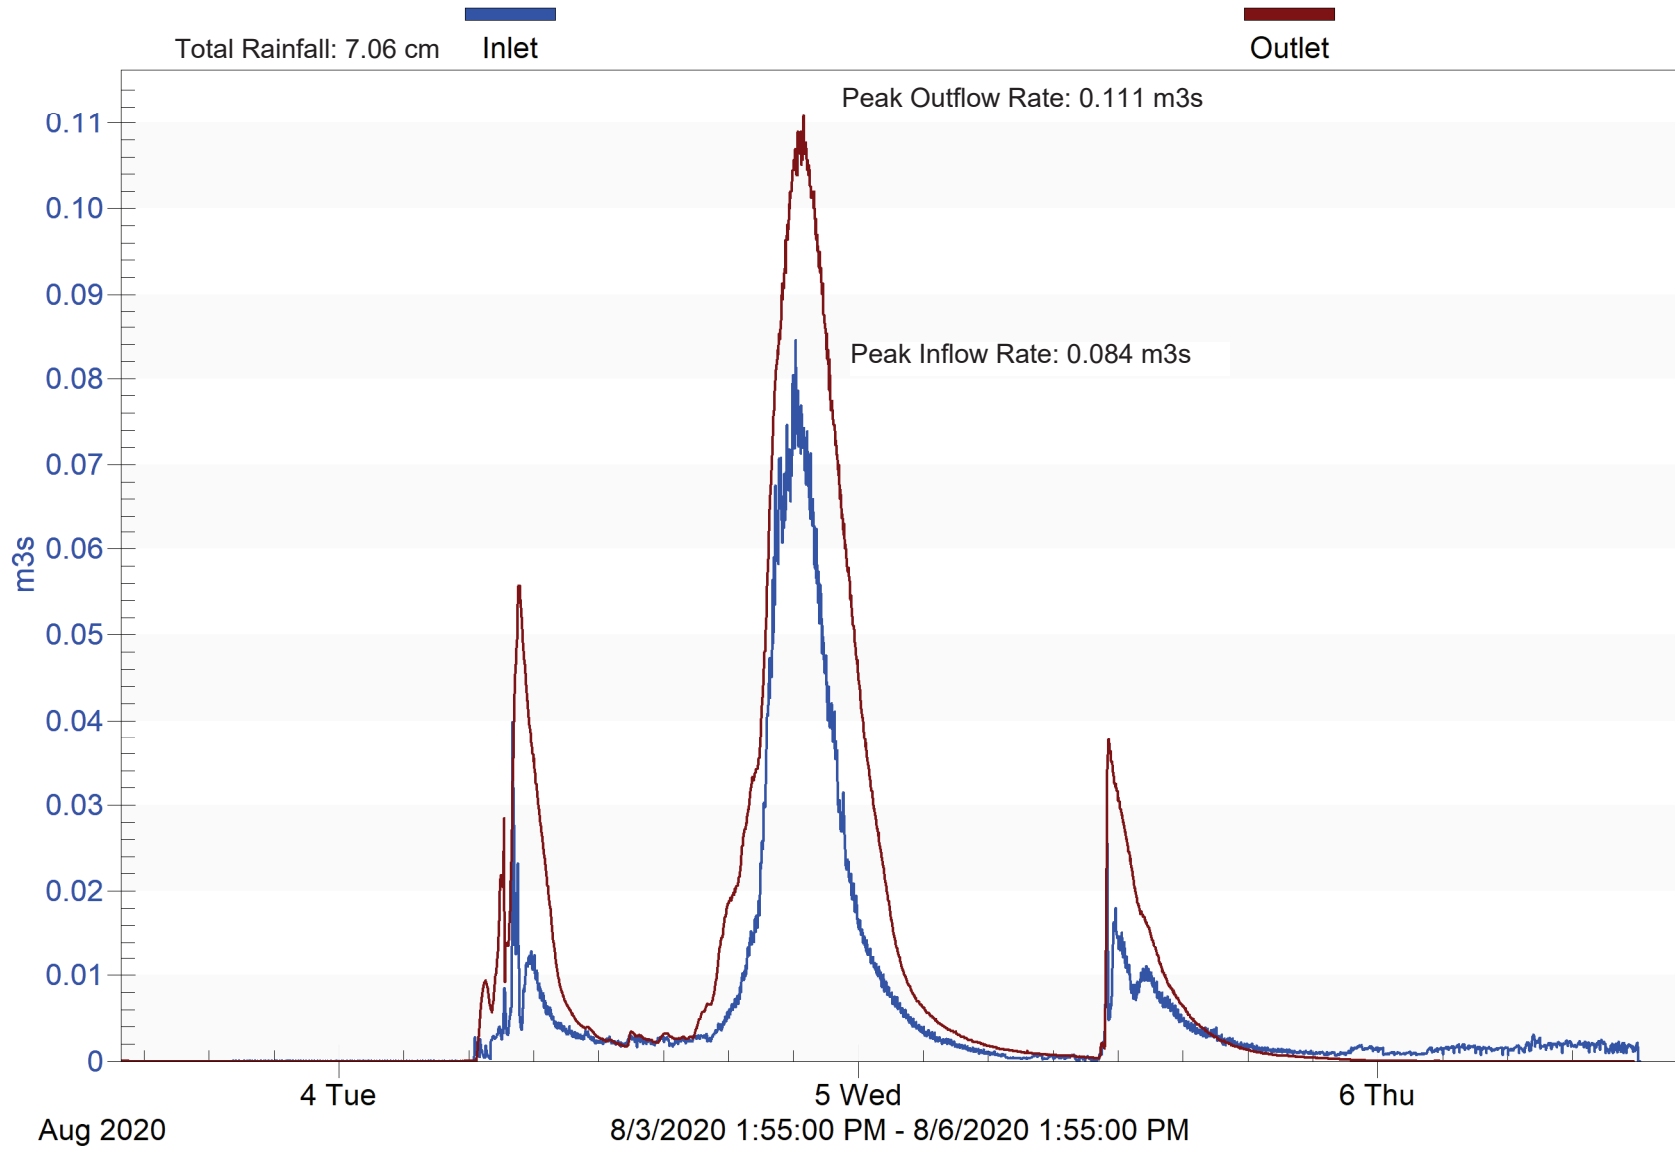

# Storm 11

Fairview Drive Wetland

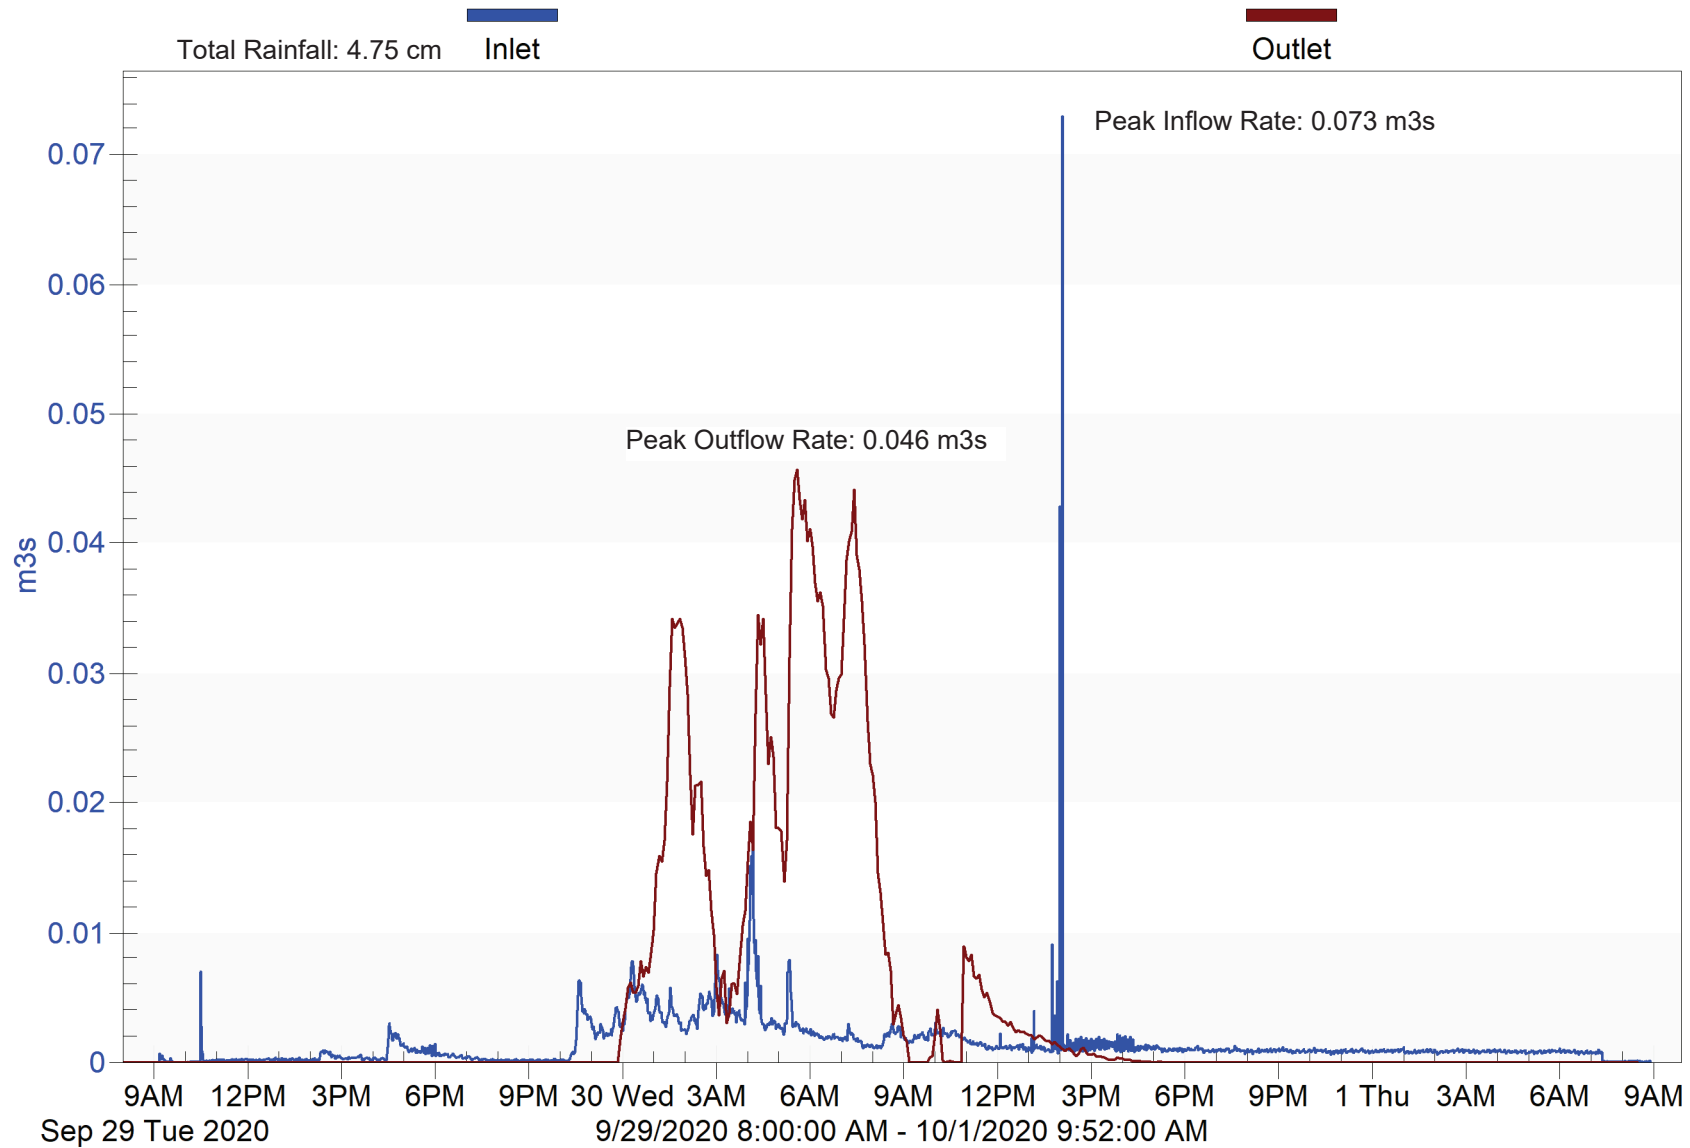

# Storm 12

Fairview Drive Wetland

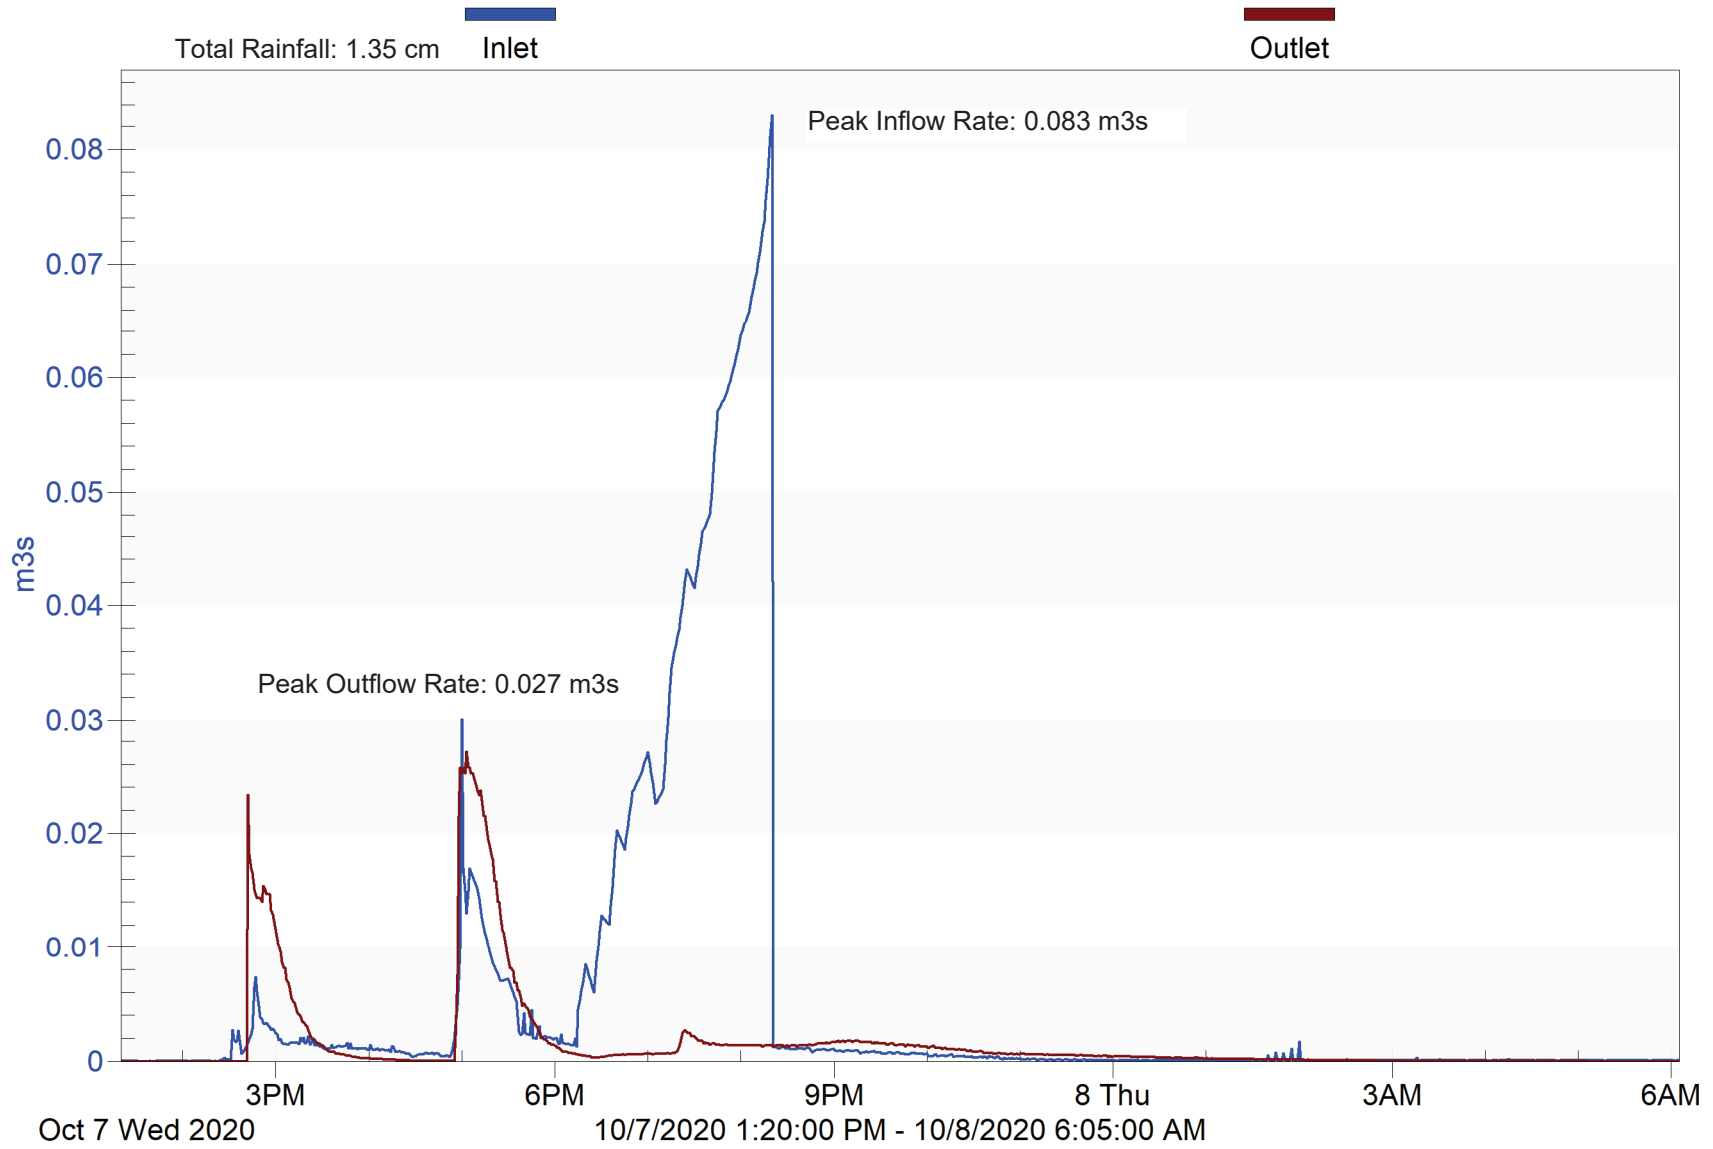



# Storm 13

Fairview Drive Wetland

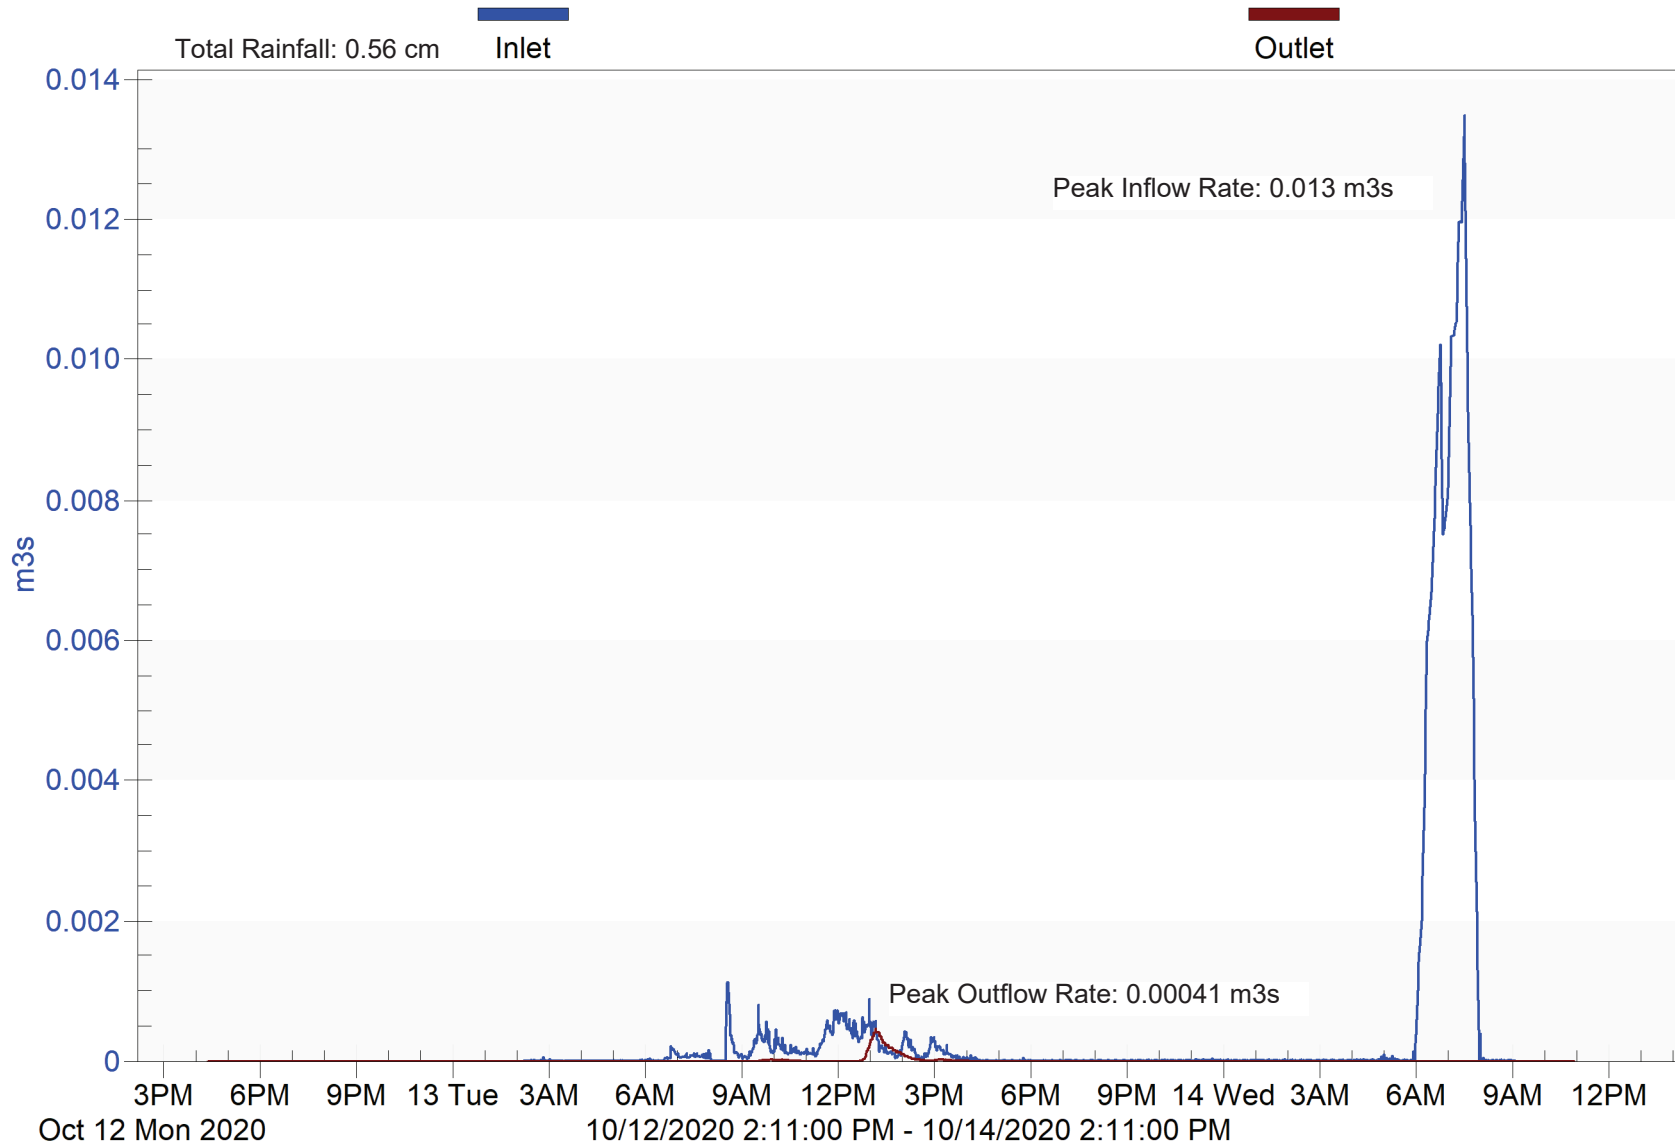

# Storm 15

## Fairview Drive Wetland

Total Rainfall: 1.19 cm

Inlet

## Outlet

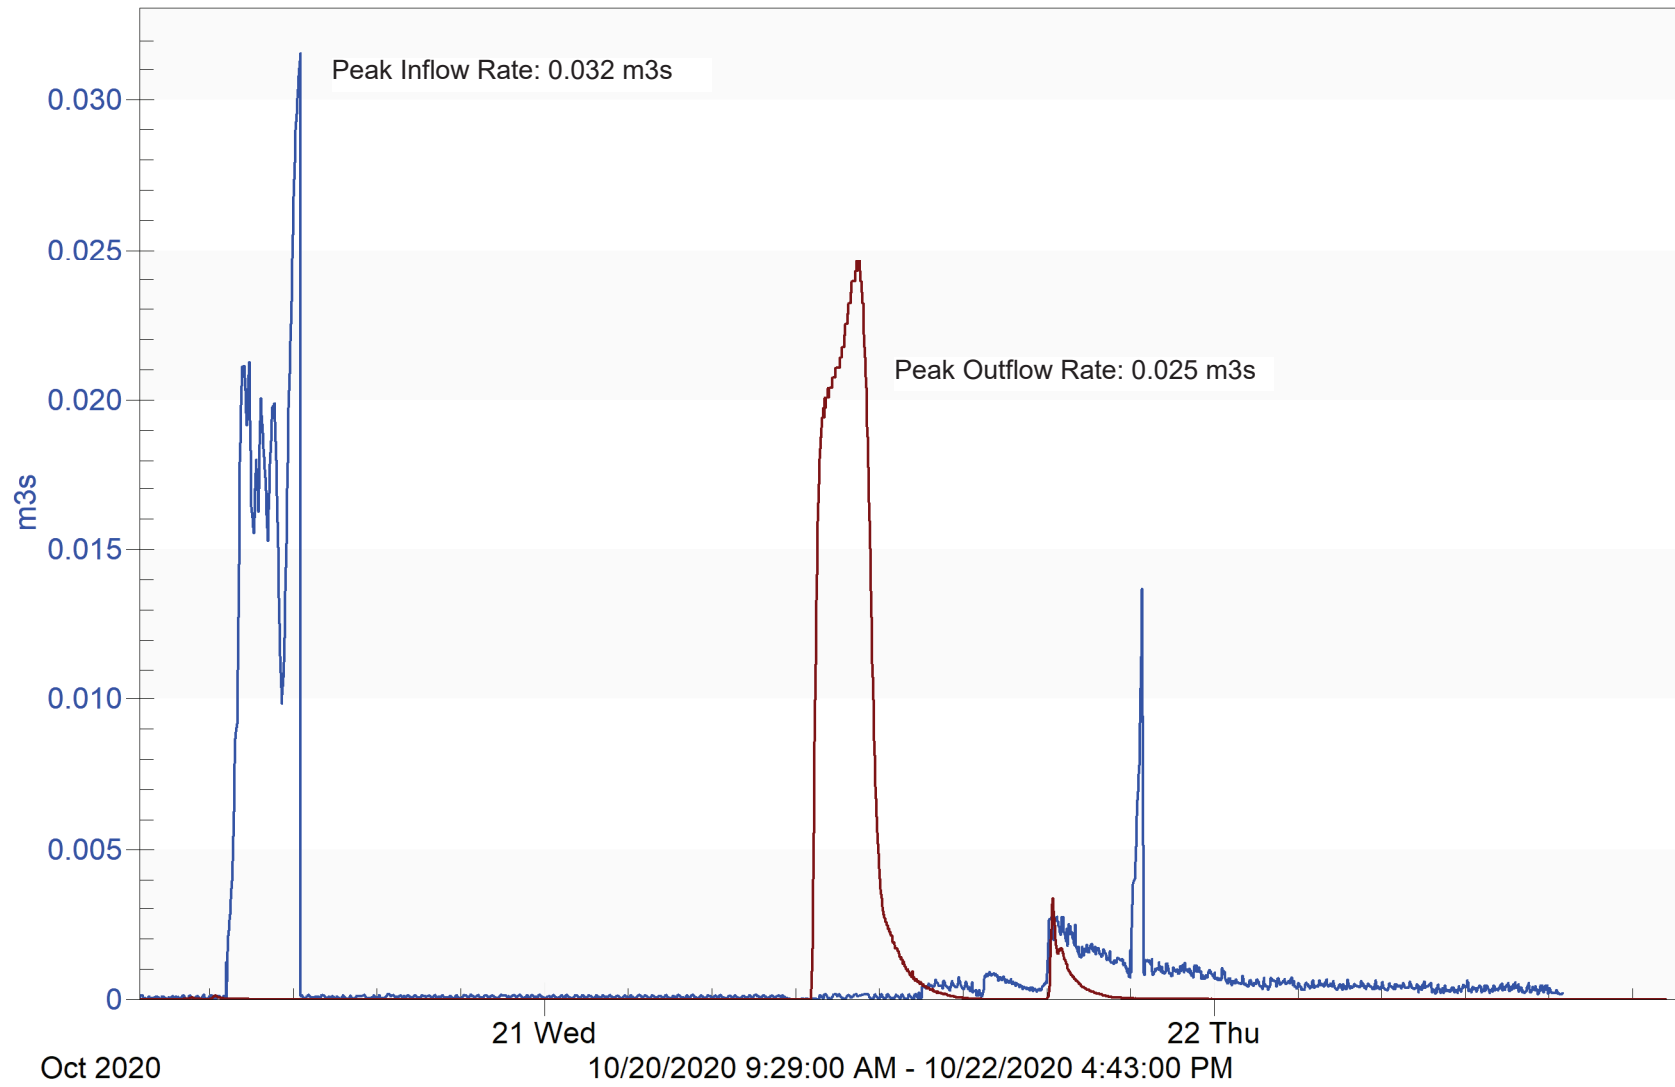

# Storm 4

Fairview Drive Wetland

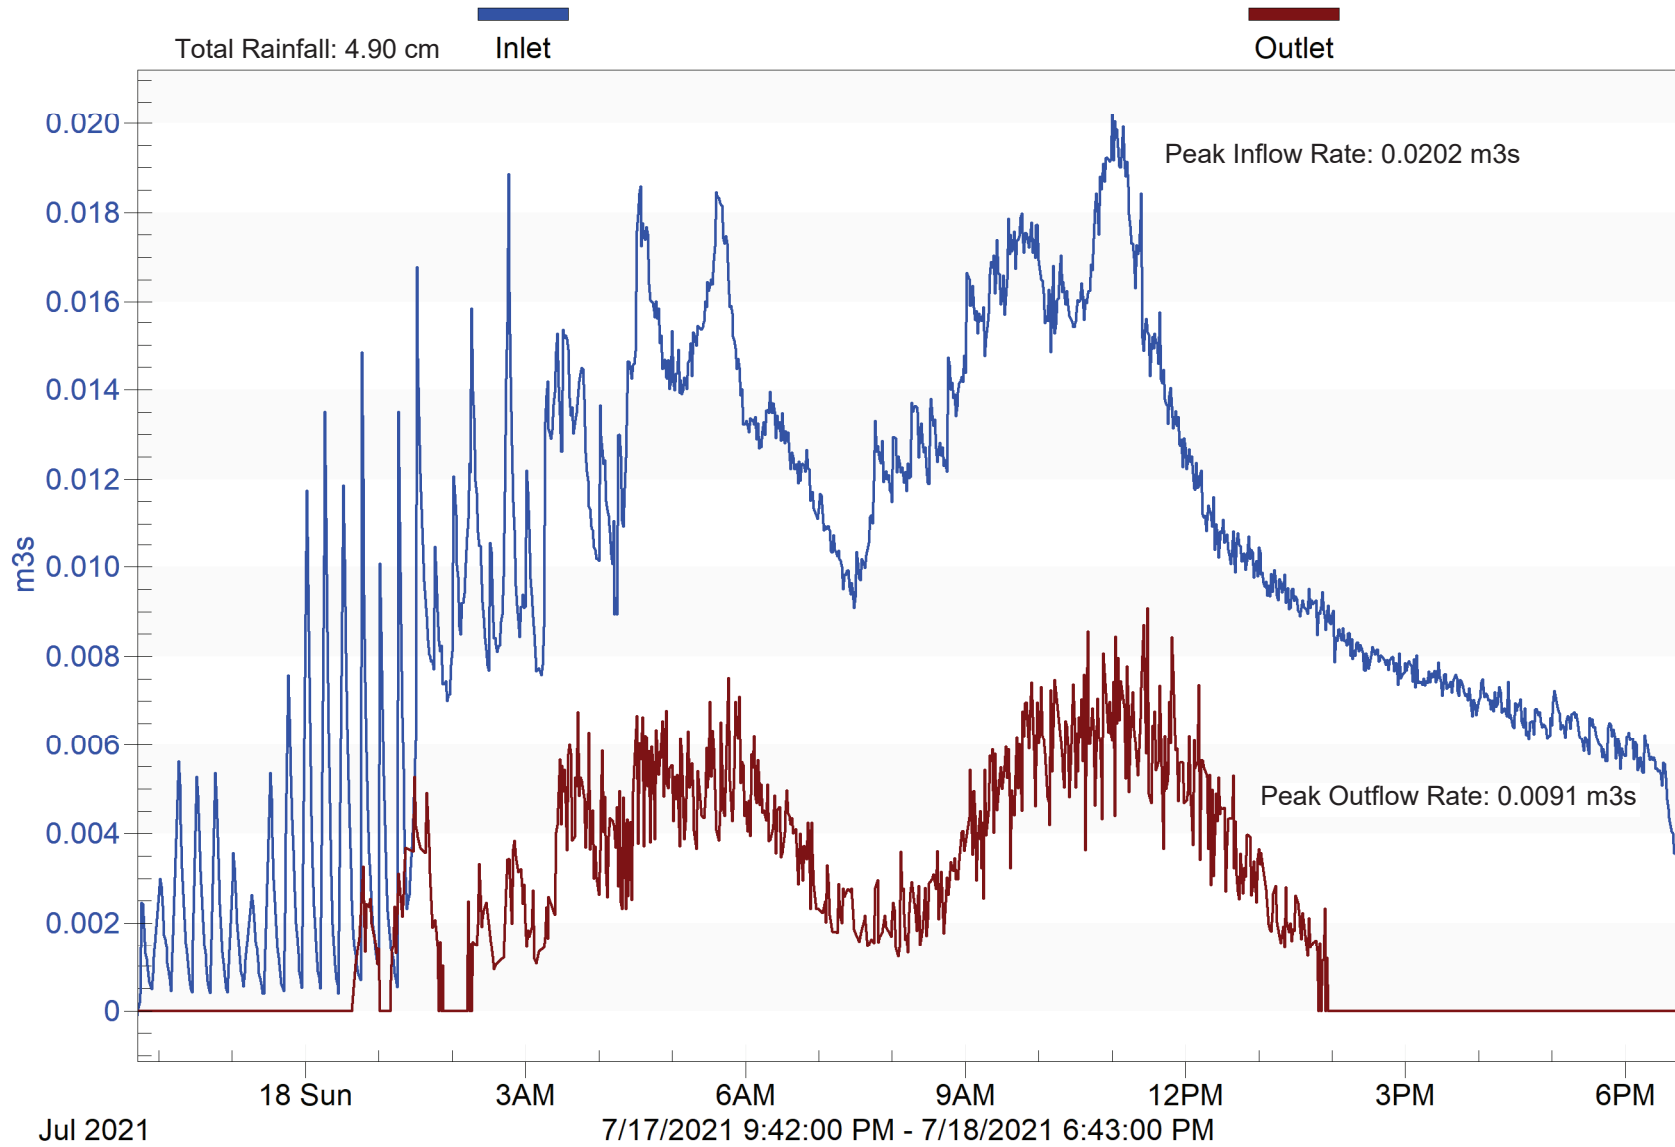

# Storm 5

Fairview Drive Wetland

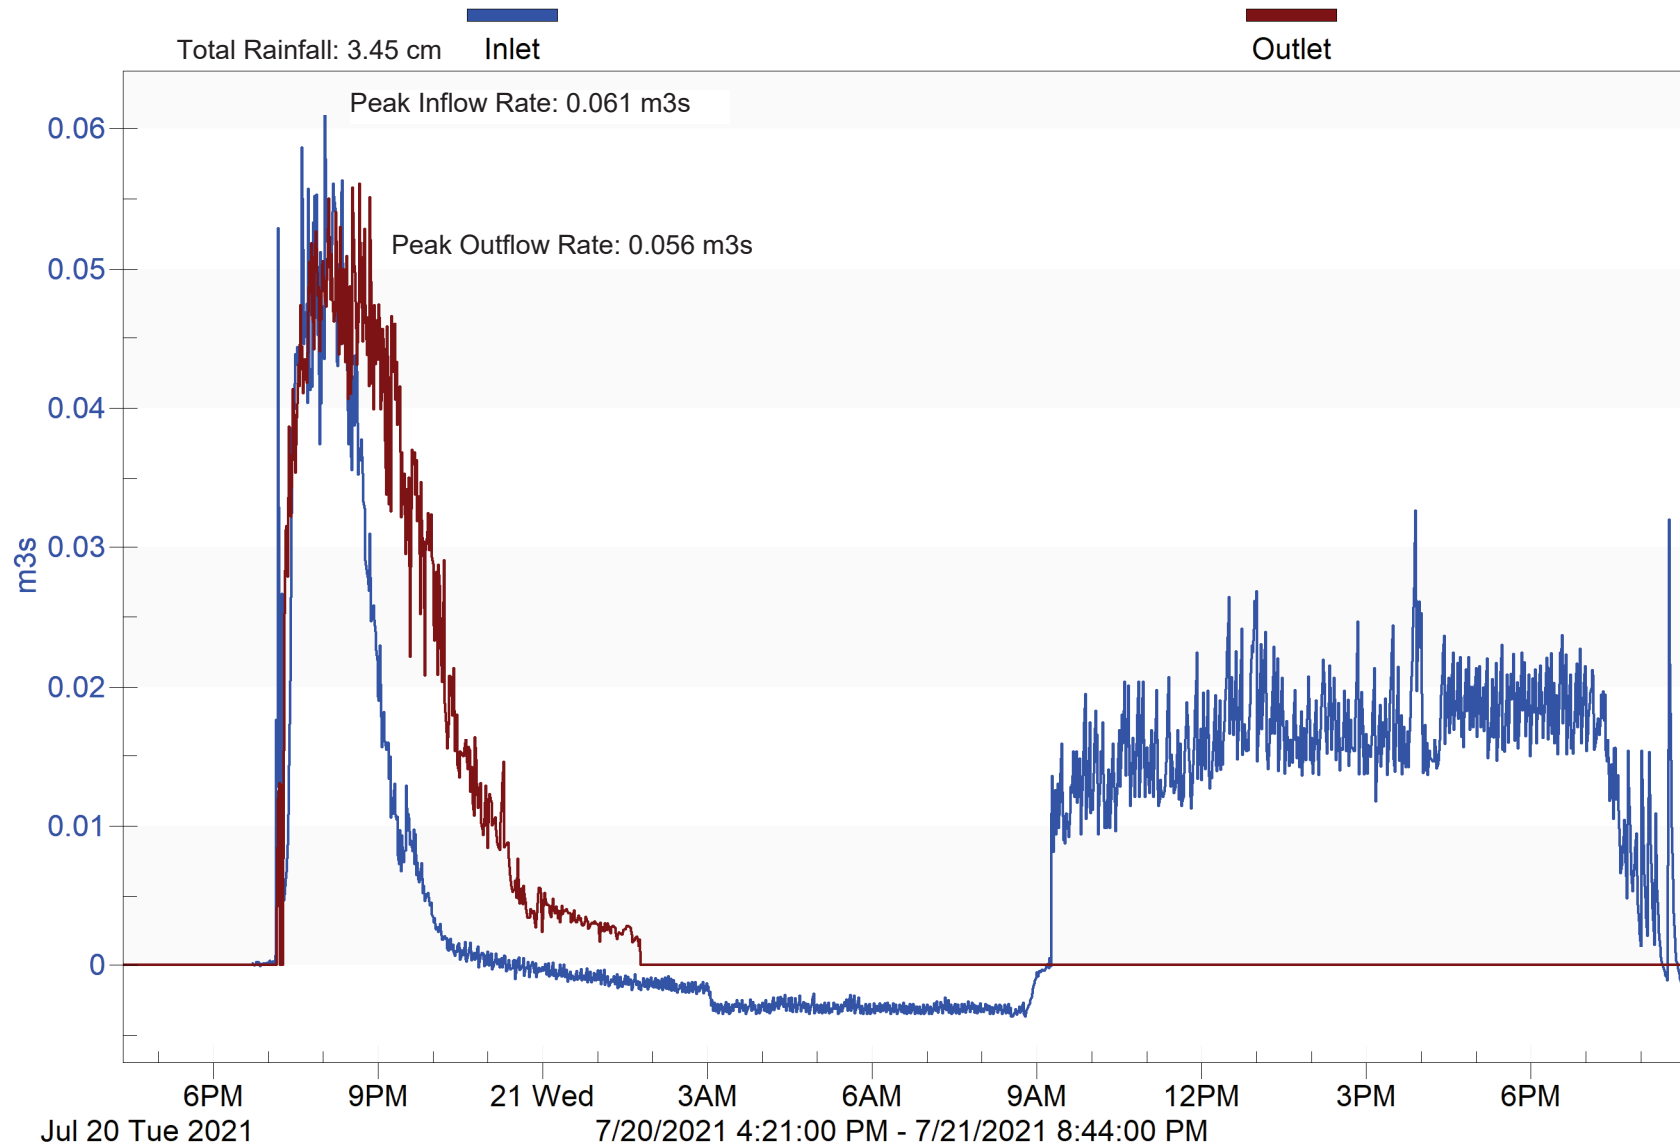

# Storm 6

Fairview Drive Wetland

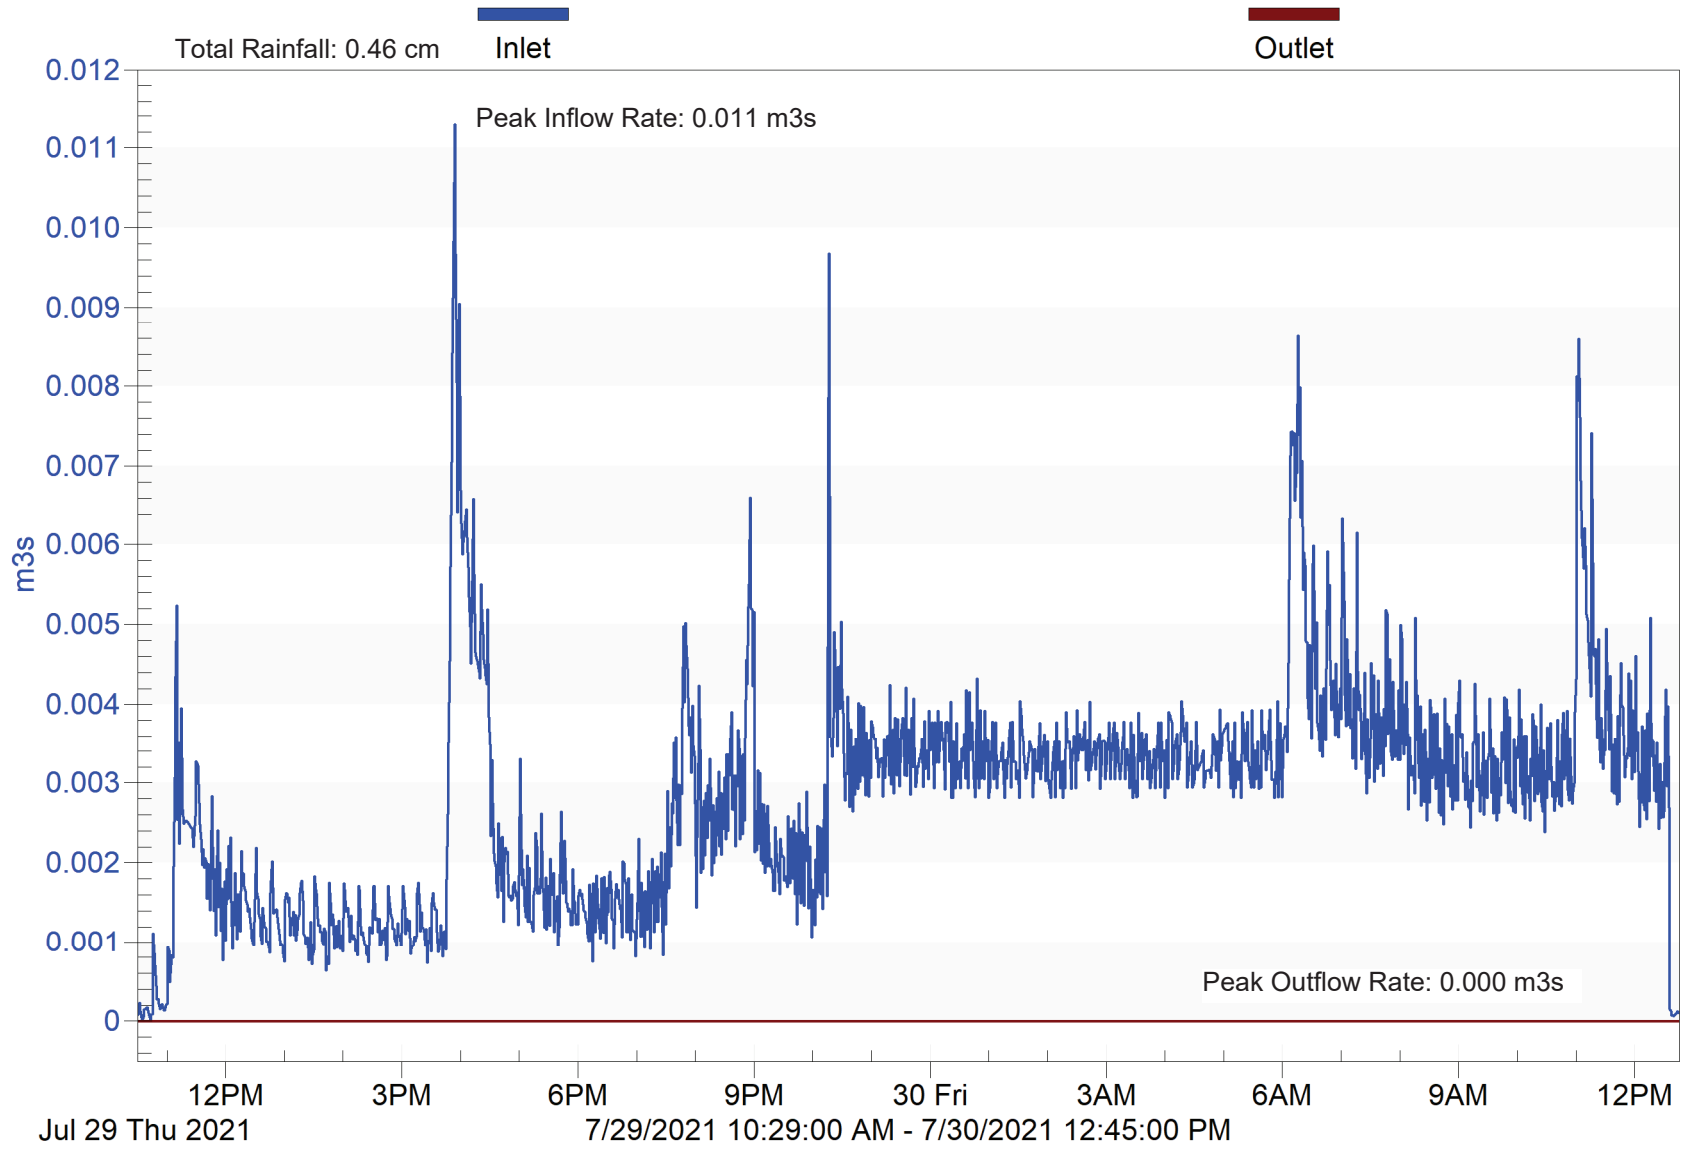

# Storm 7

Fairview Drive Wetland

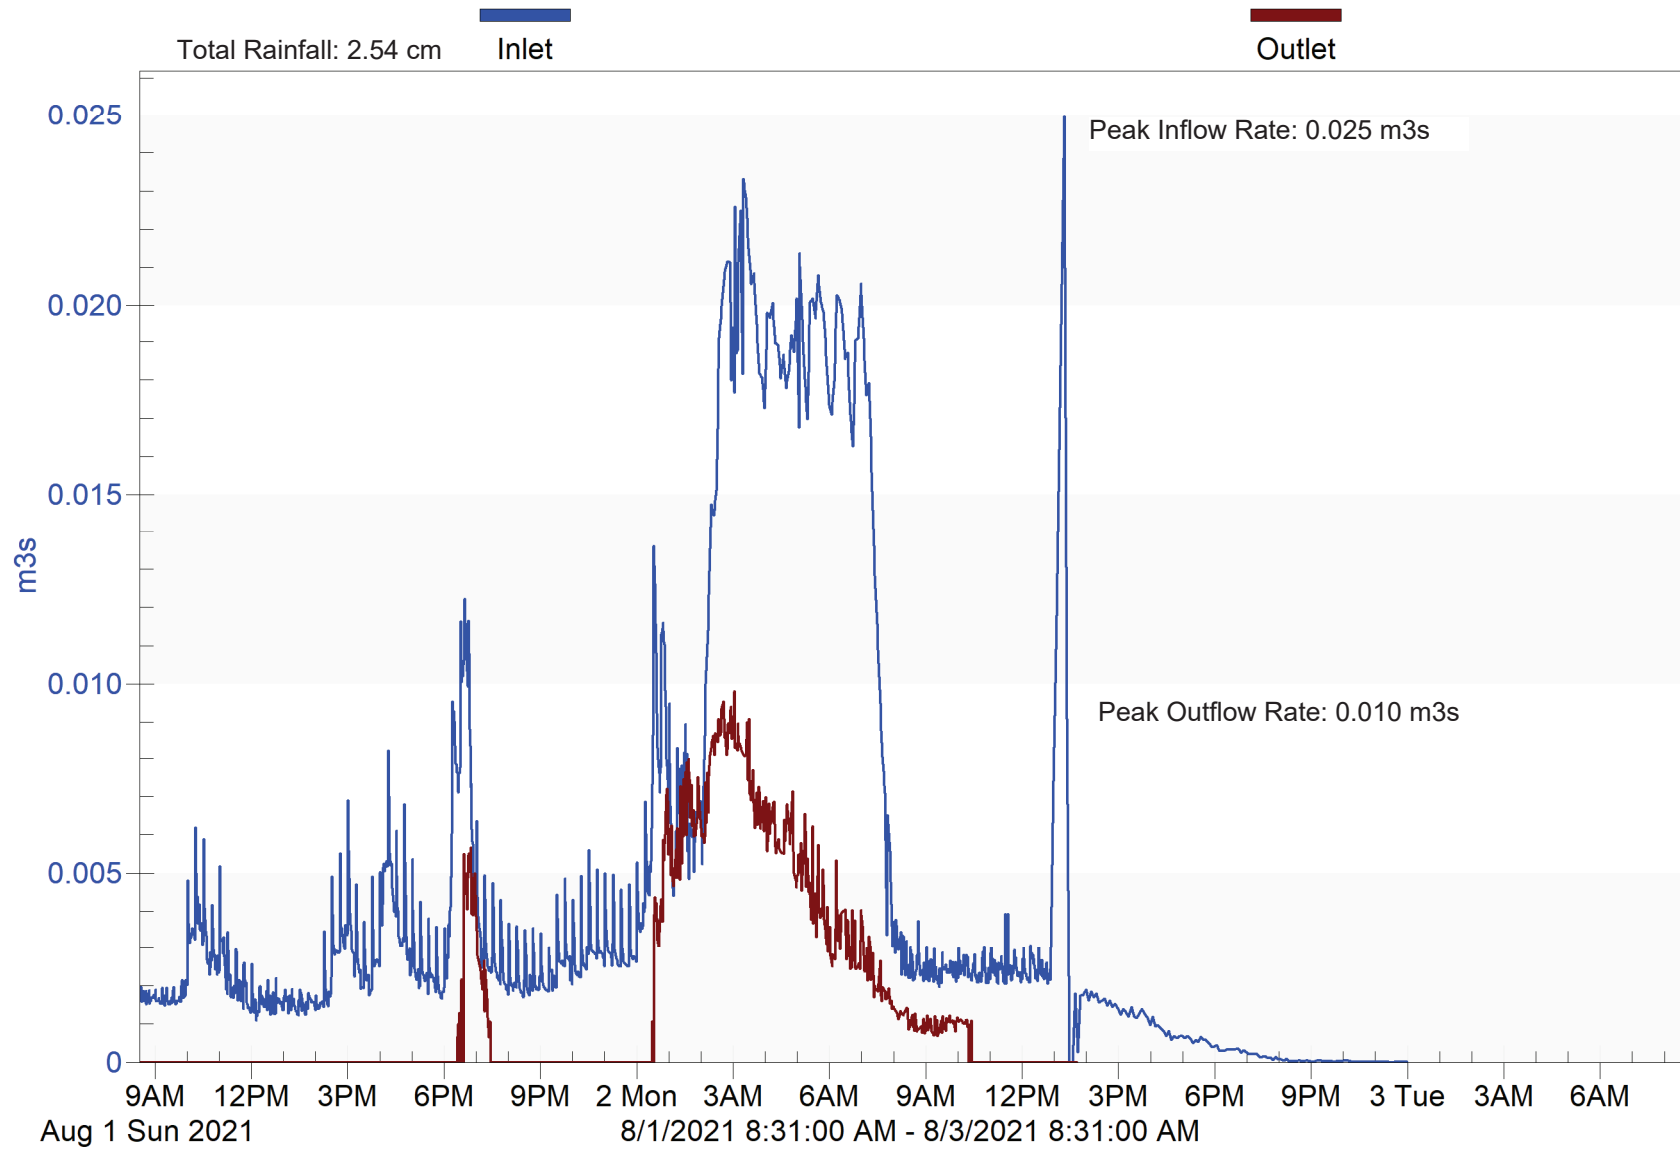

## Fairview Drive Wetland

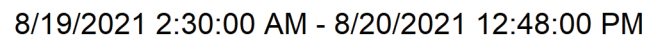

# Storm 11

Fairview Drive Wetland

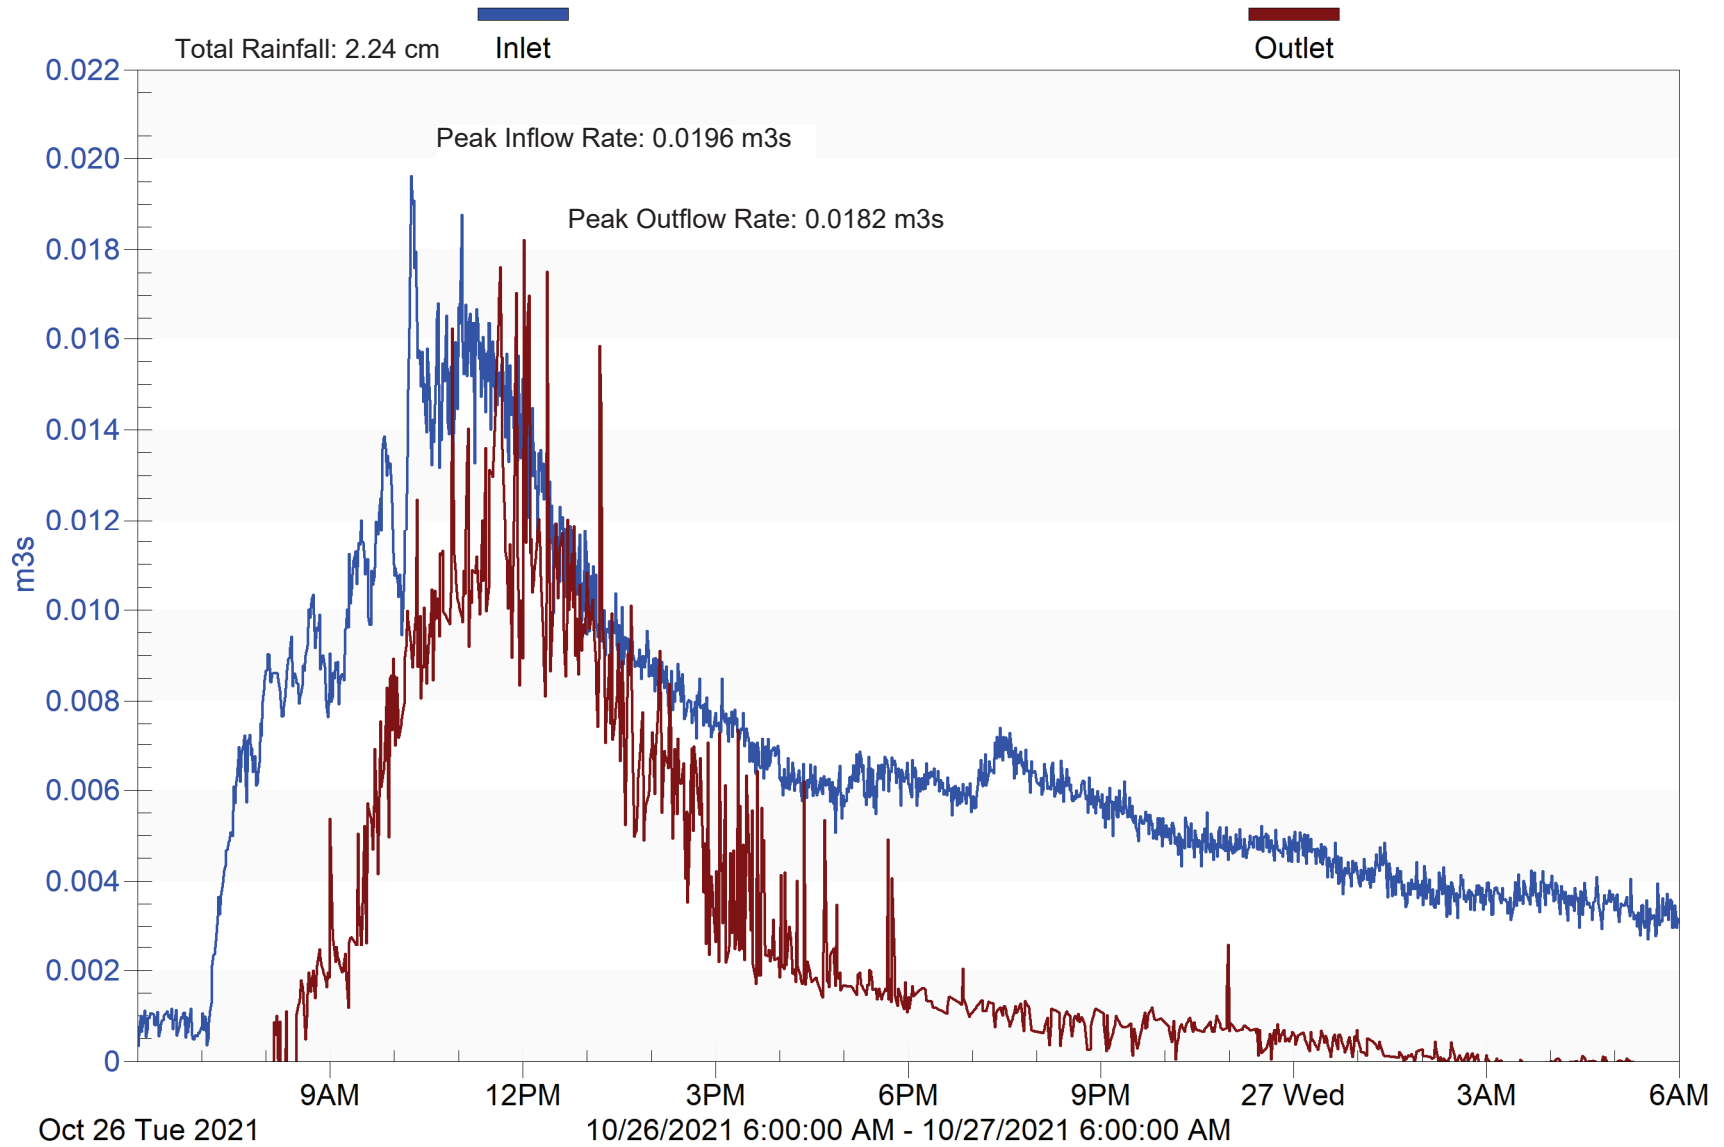



# Storm 2

Kennedy Drive Wetland

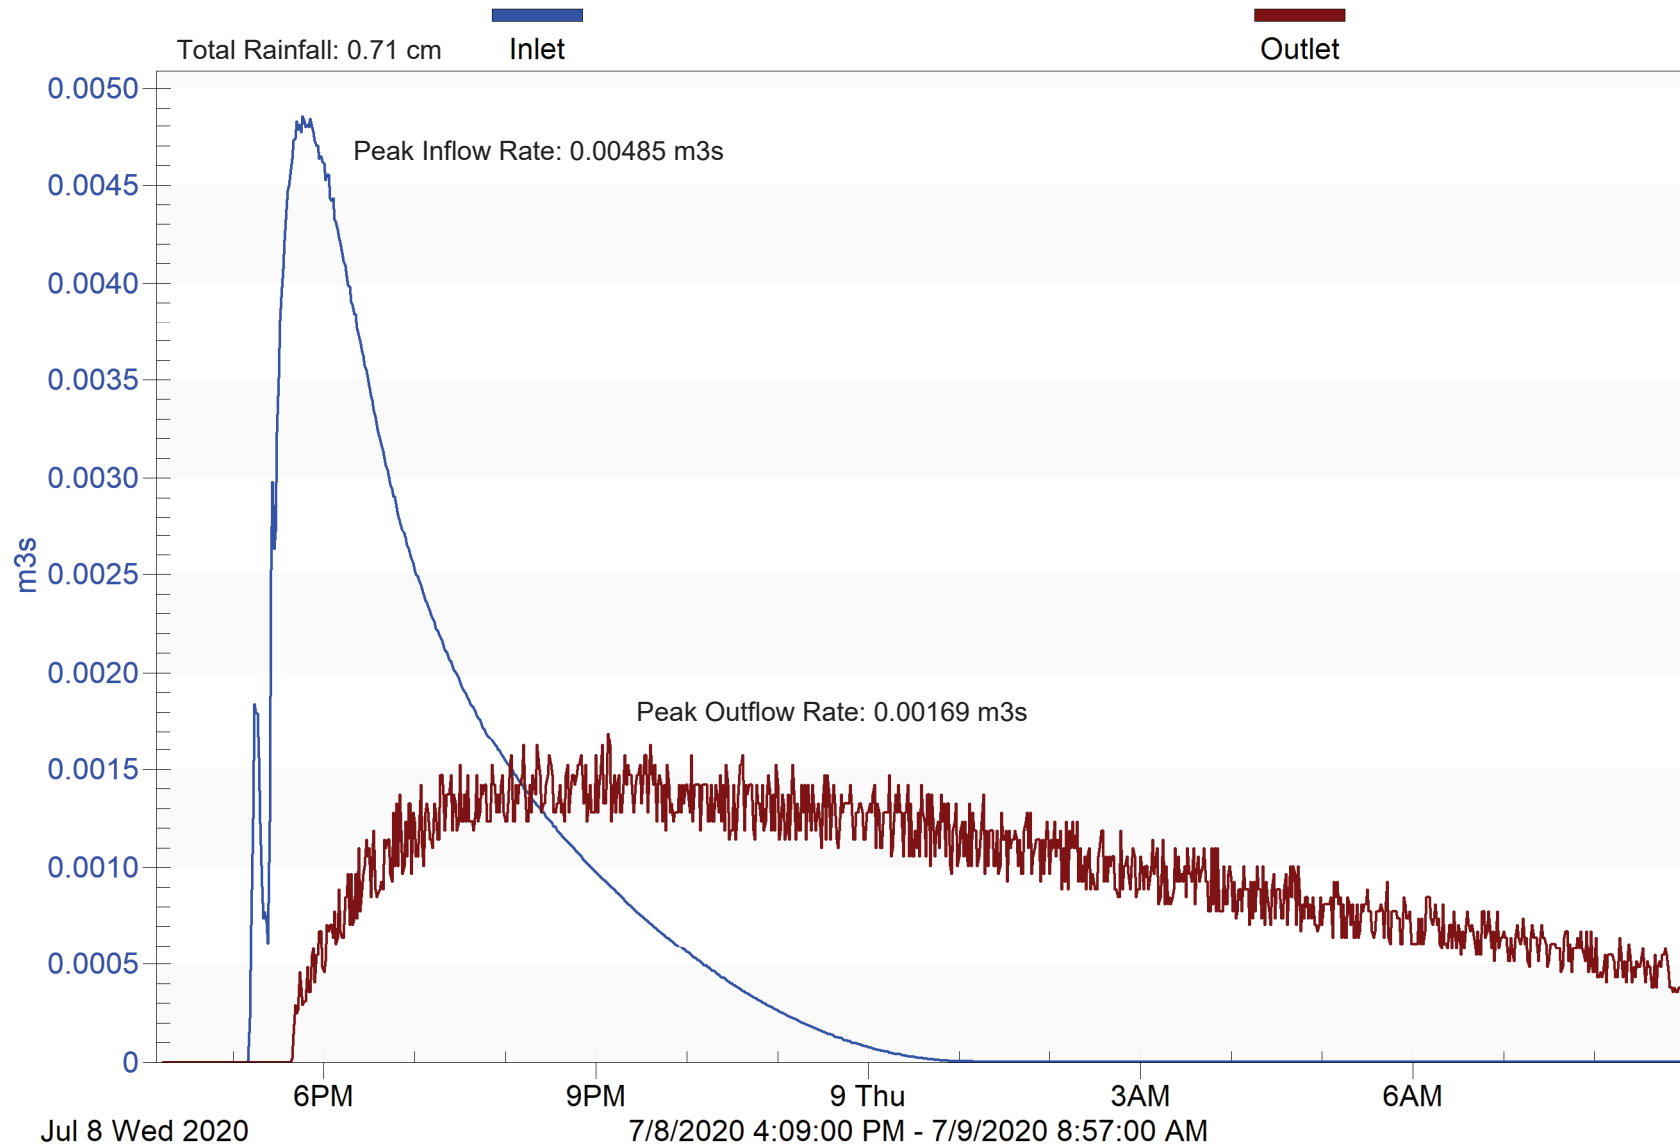

# Storm 3

Kennedy Drive Wetland

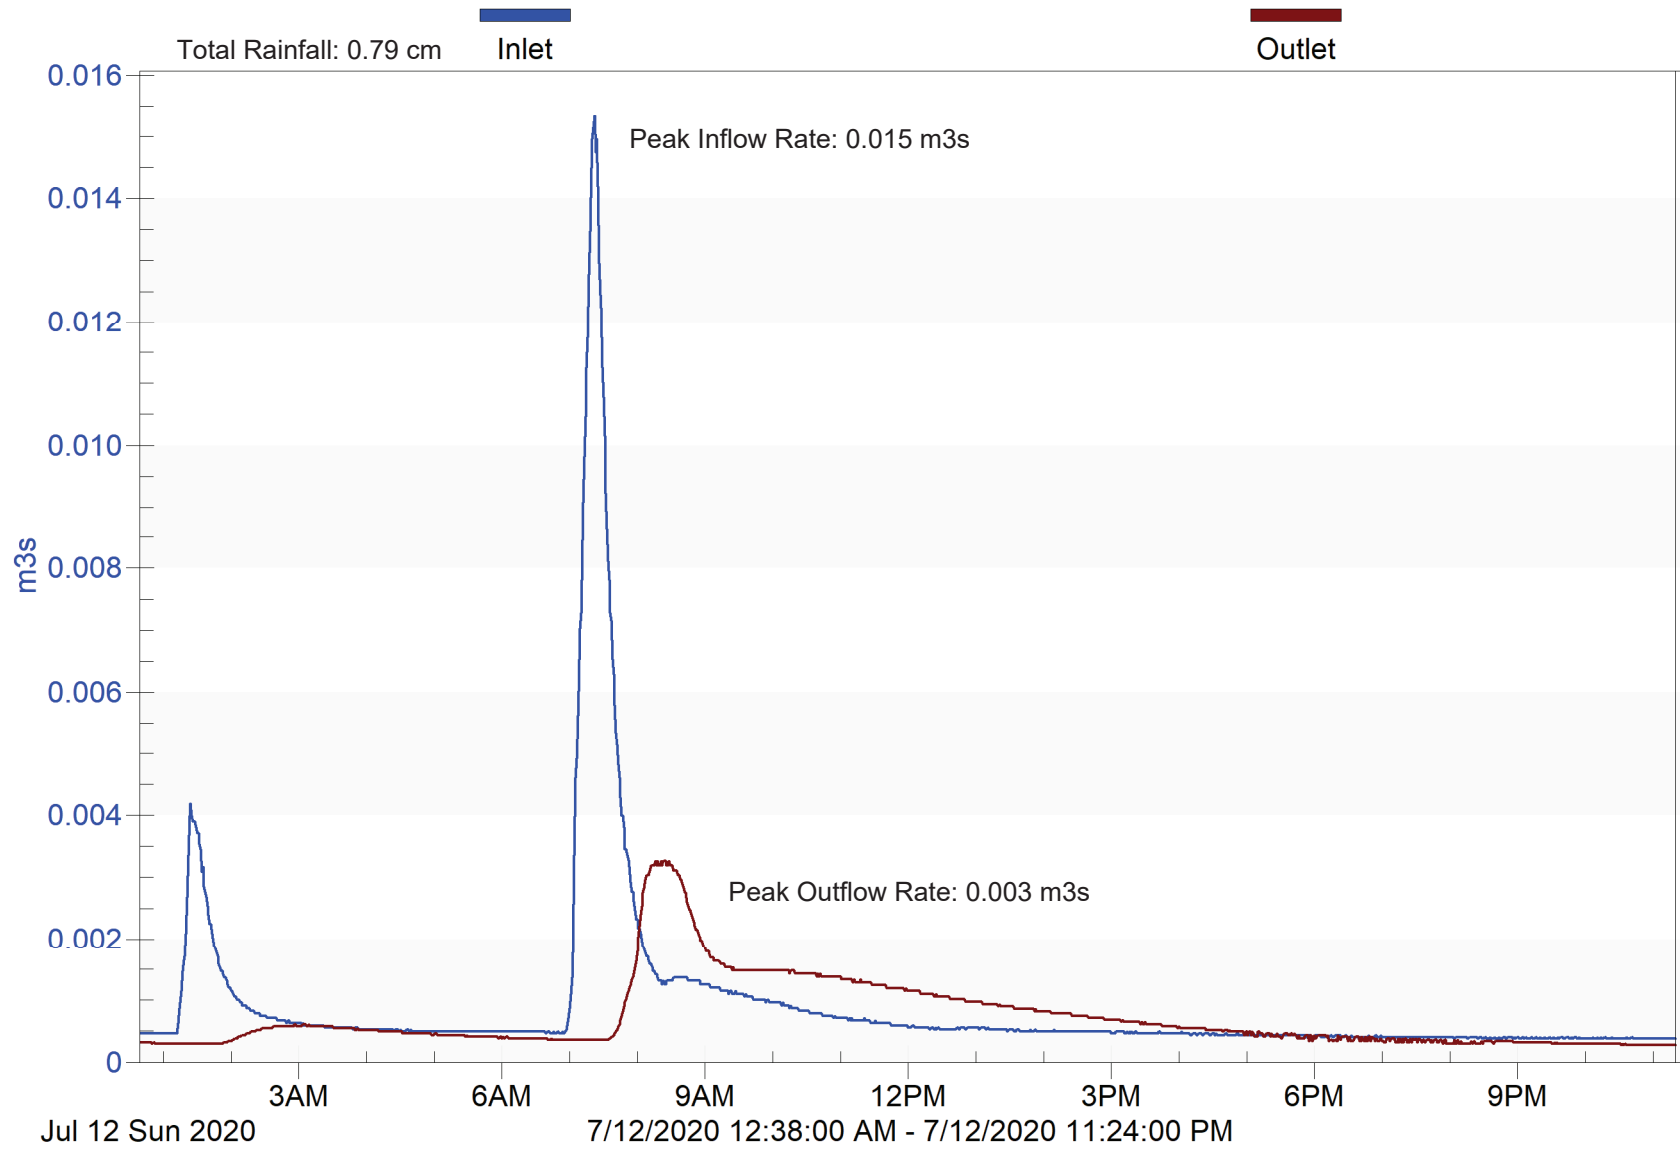

# Storm 4

Kennedy Drive Wetland

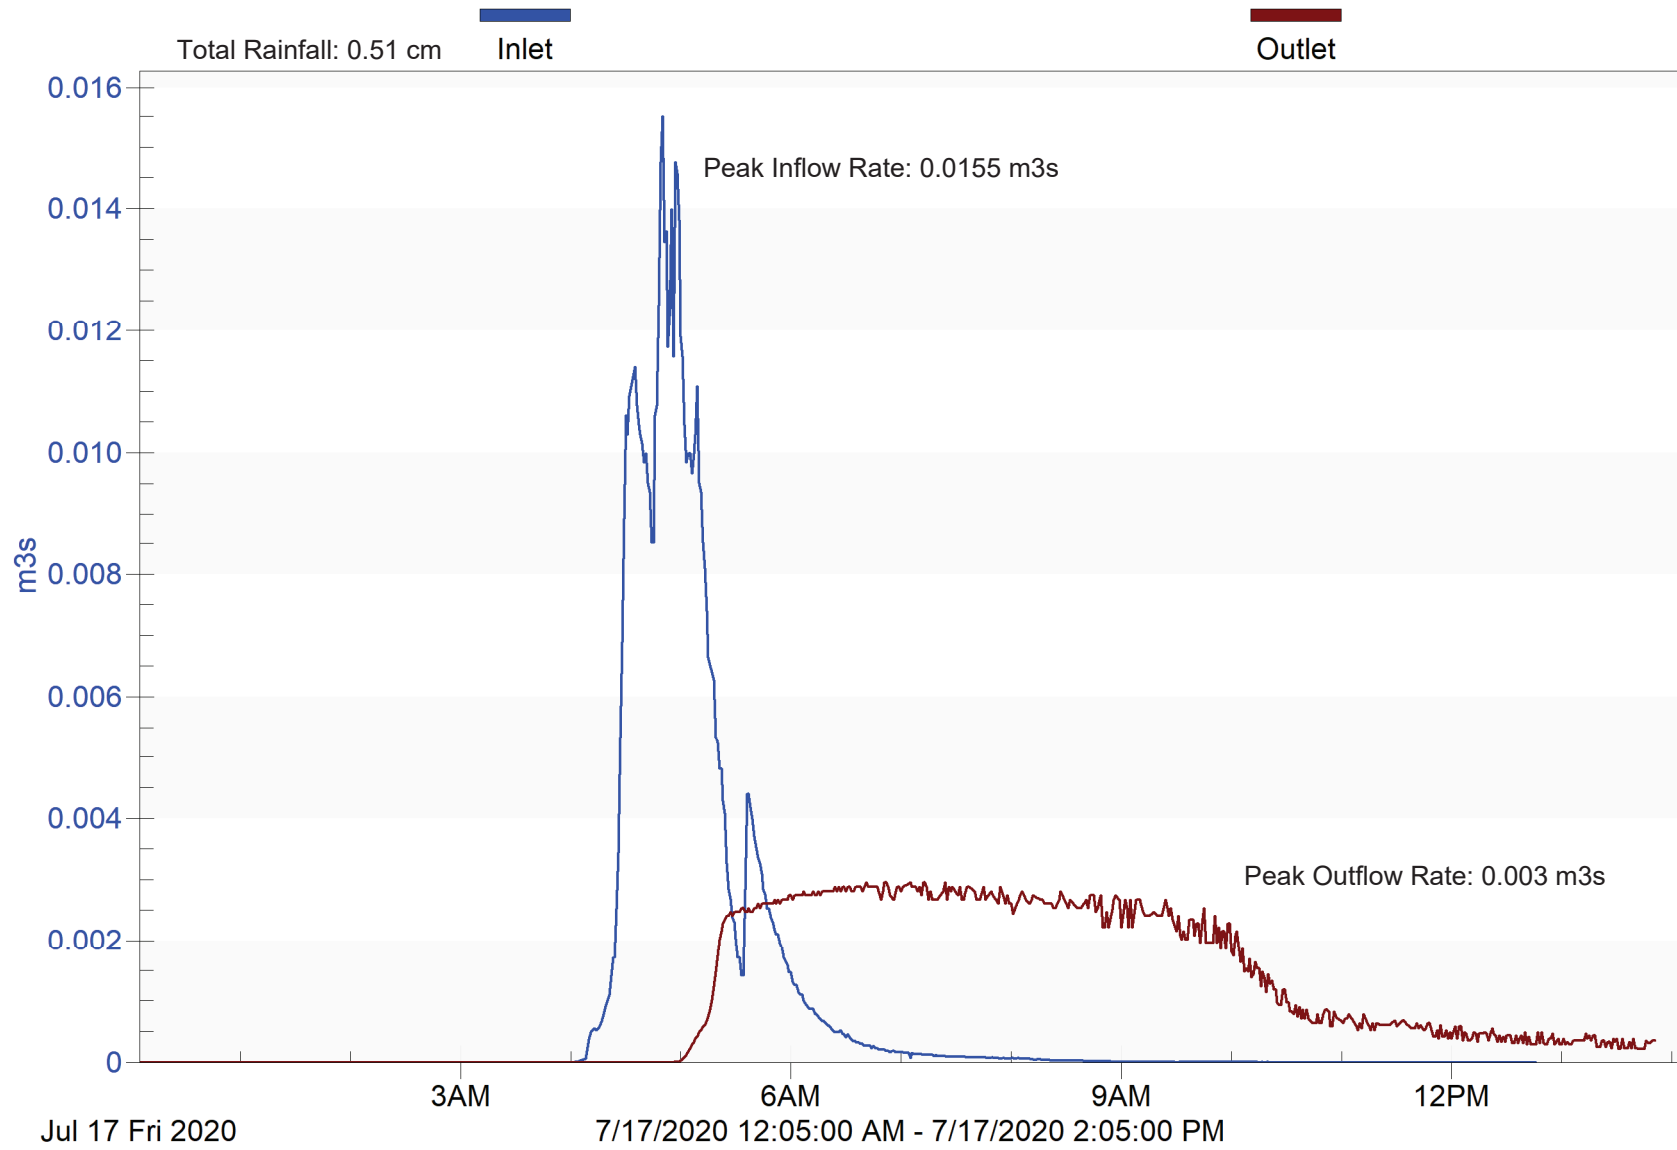

# Storm 5

Kennedy Drive Wetland

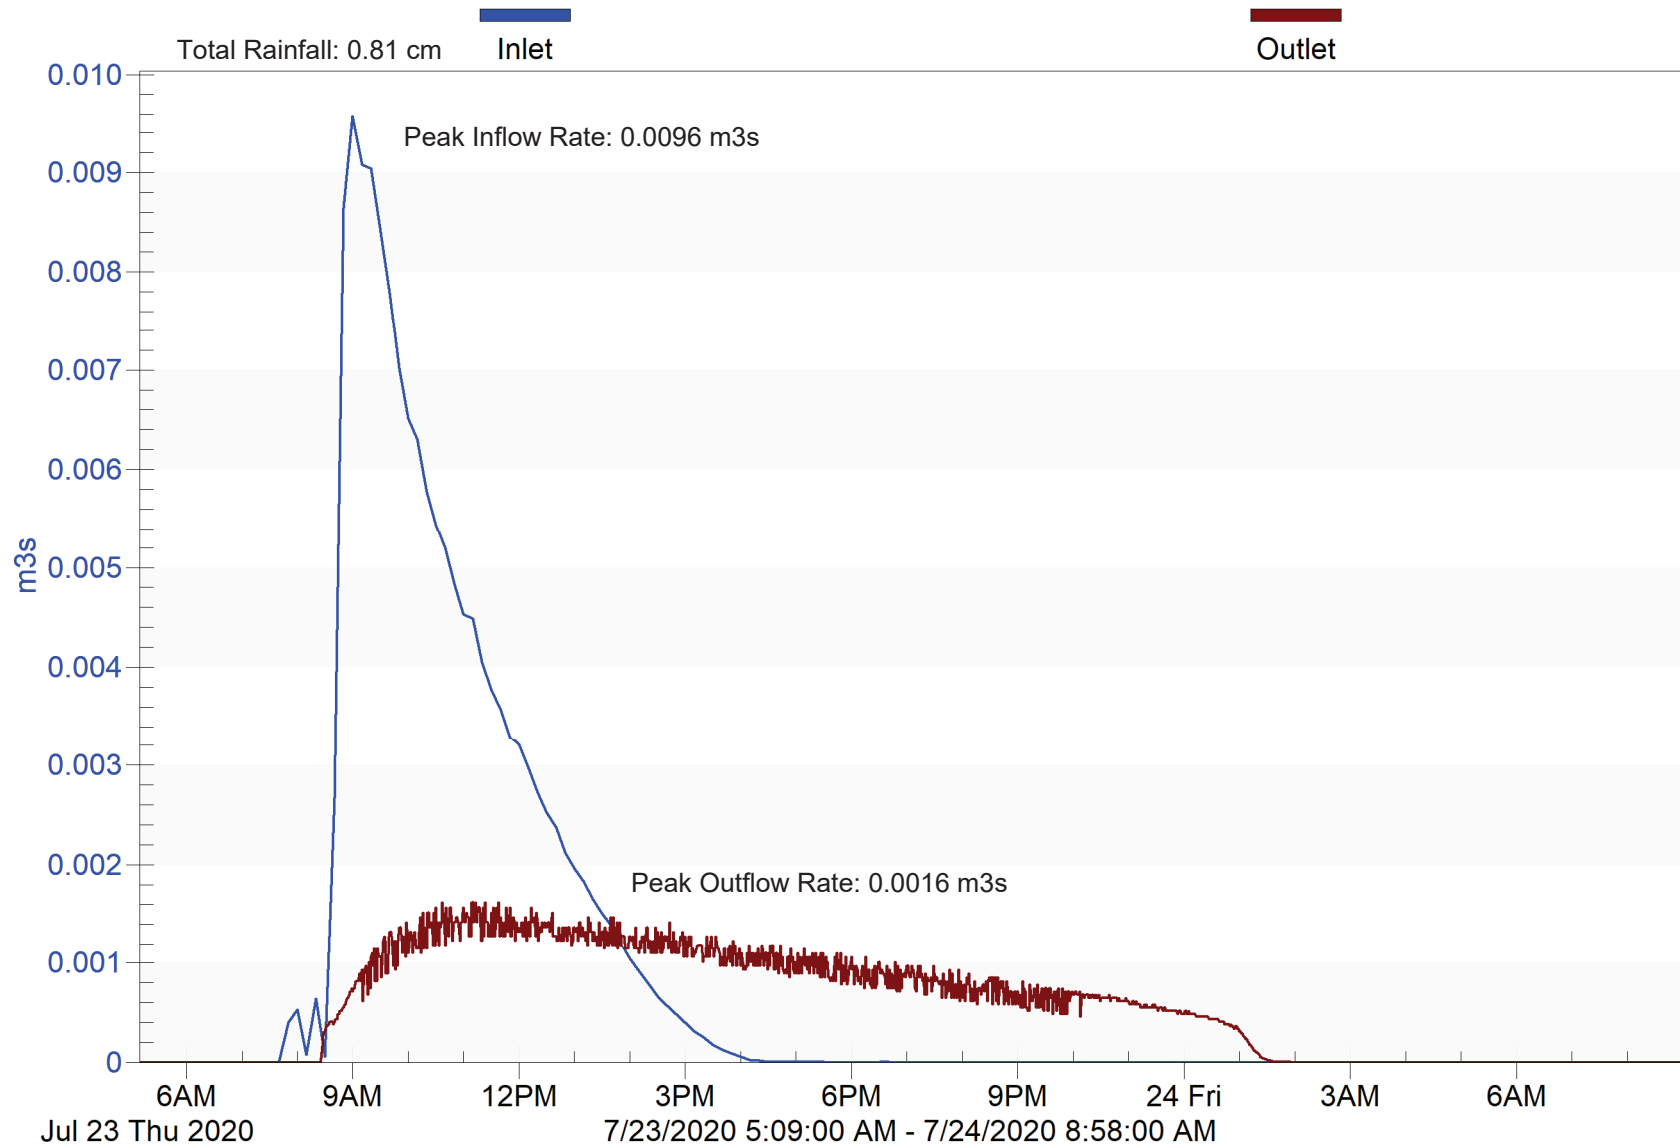

# Storm 6

Kennedy Drive Wetland

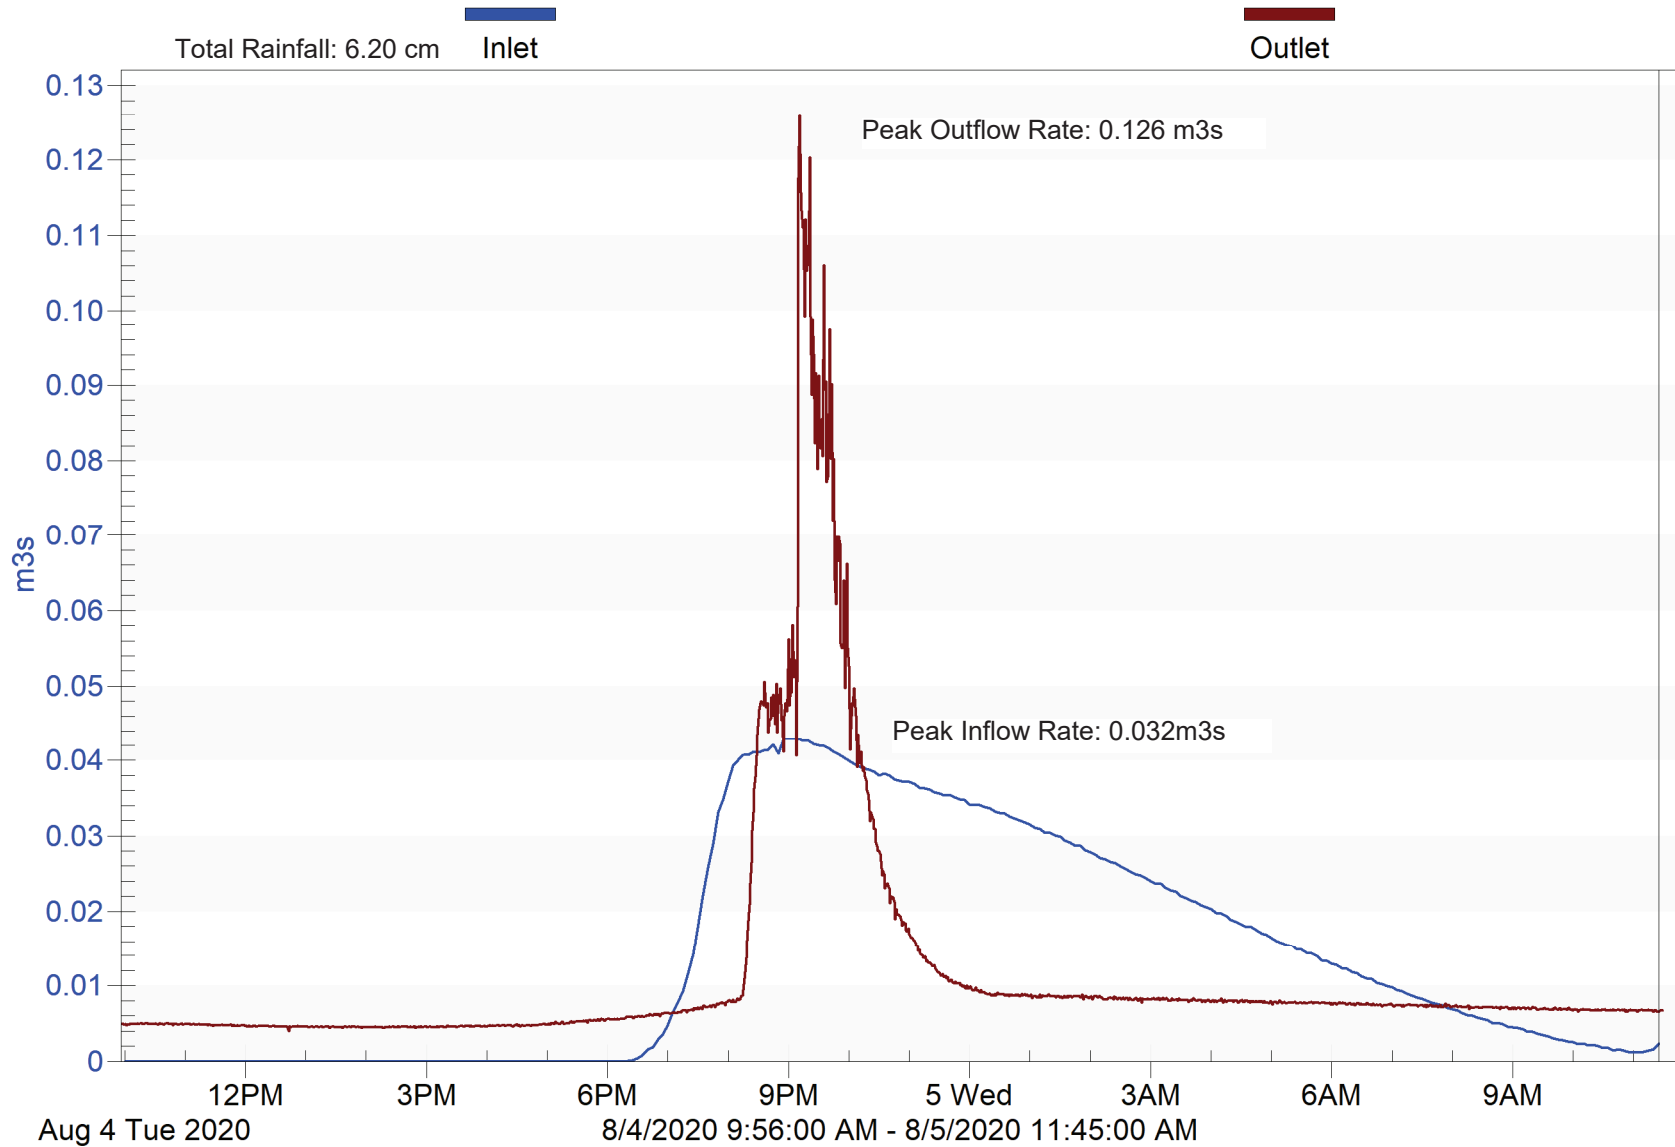

# Storm 8

Kennedy Drive Wetland

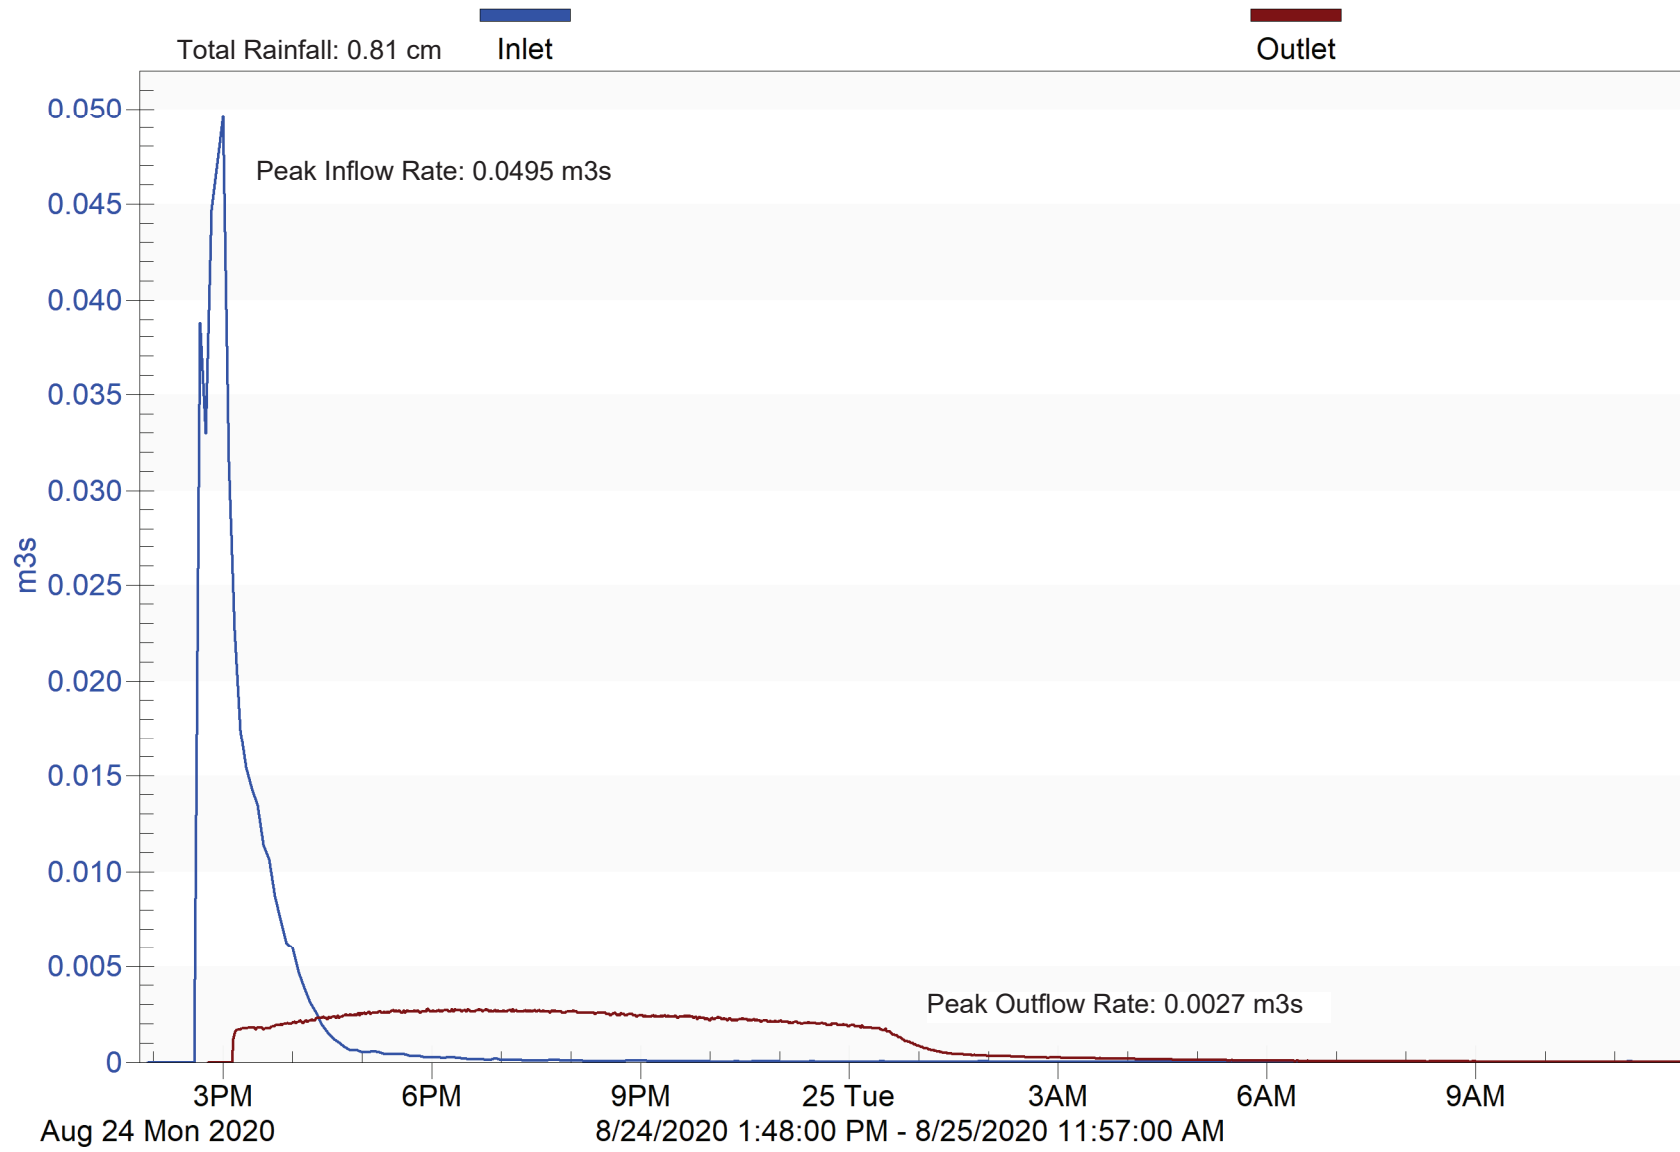

# Storm 9

Kennedy Drive Wetland

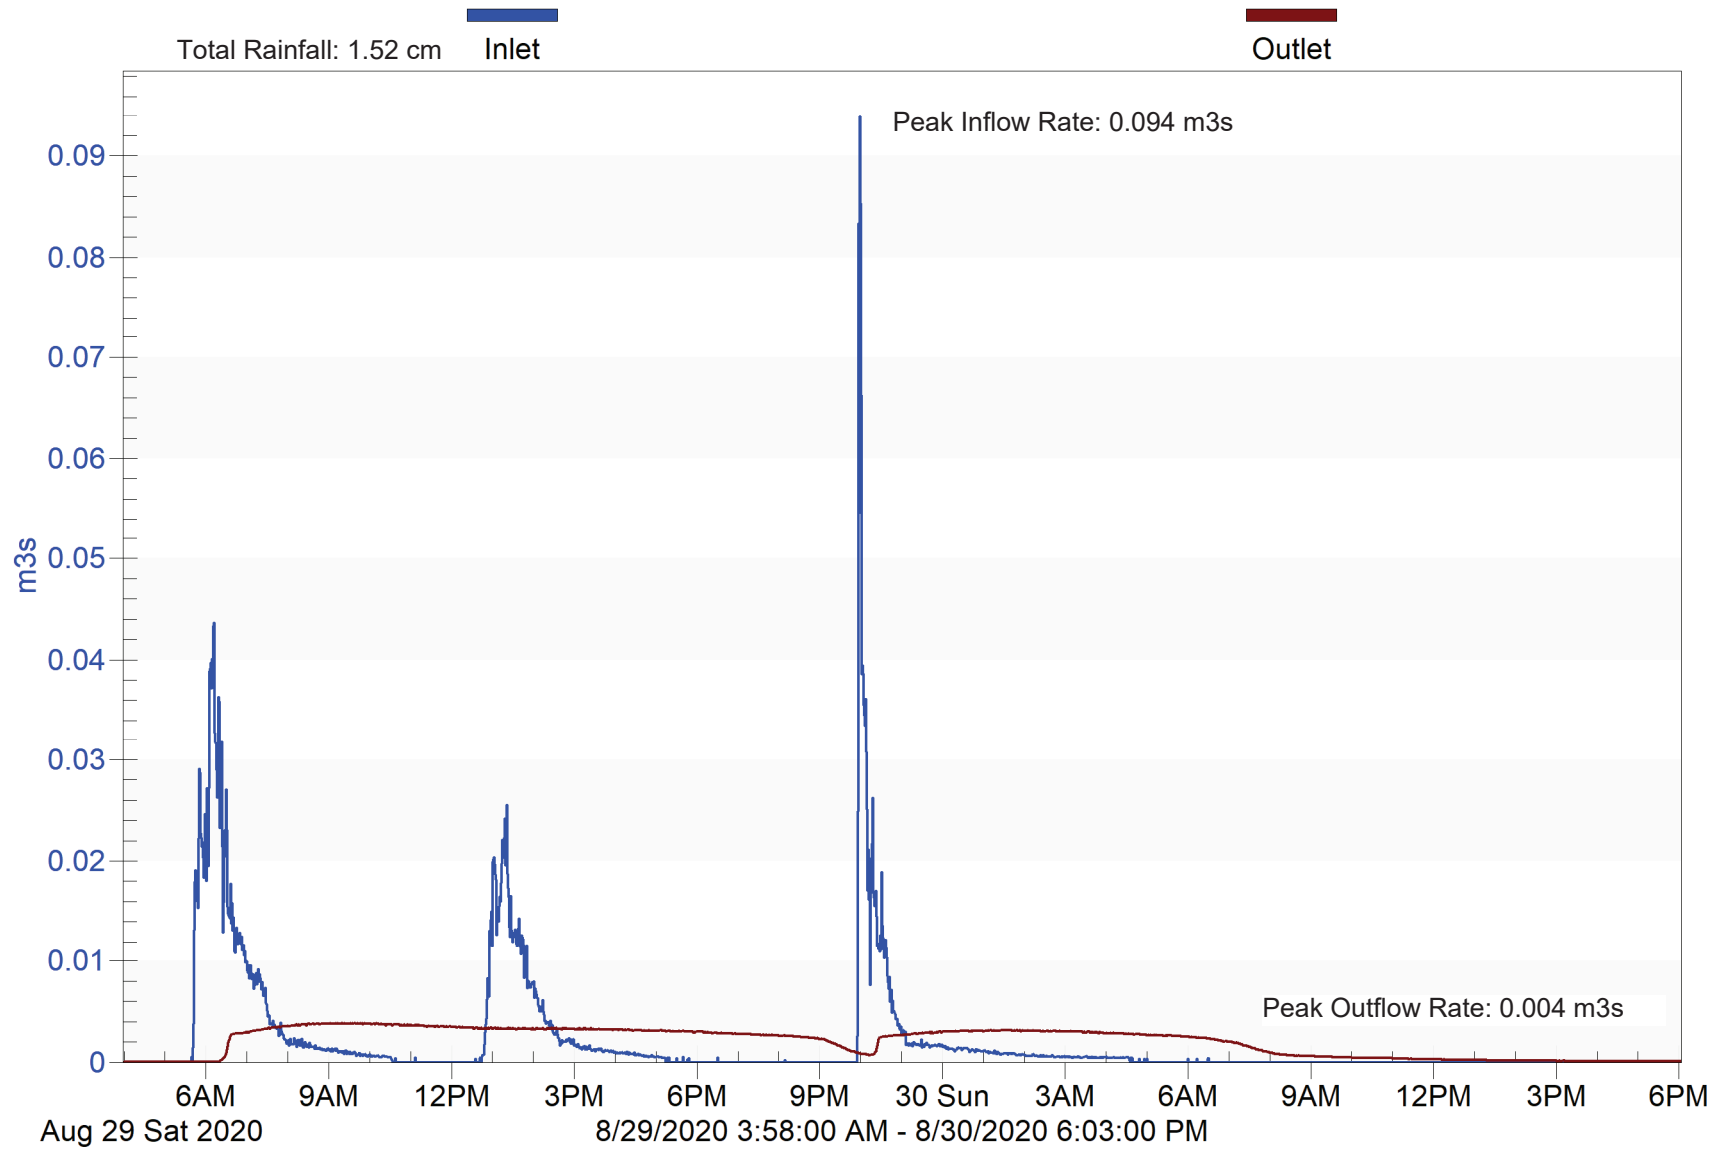

# Storm 10

Kennedy Drive Wetland

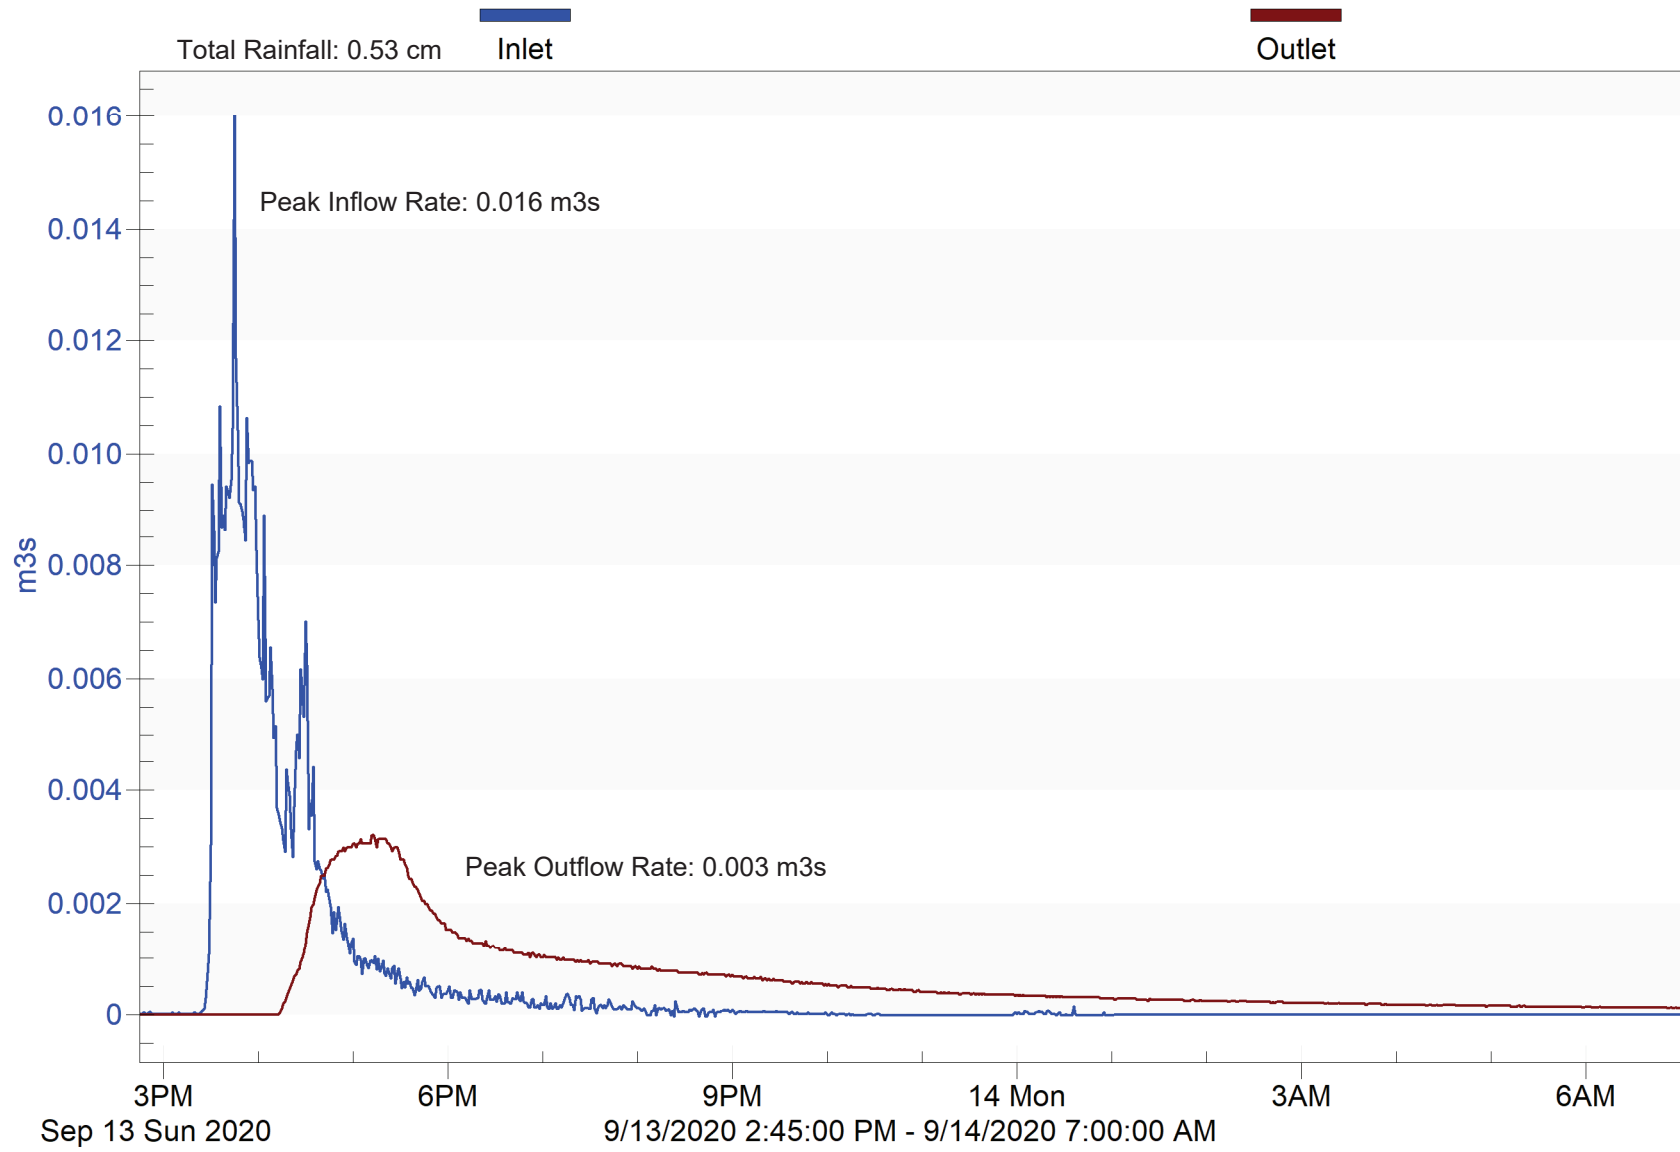



# Storm 11

Kennedy Drive Wetland

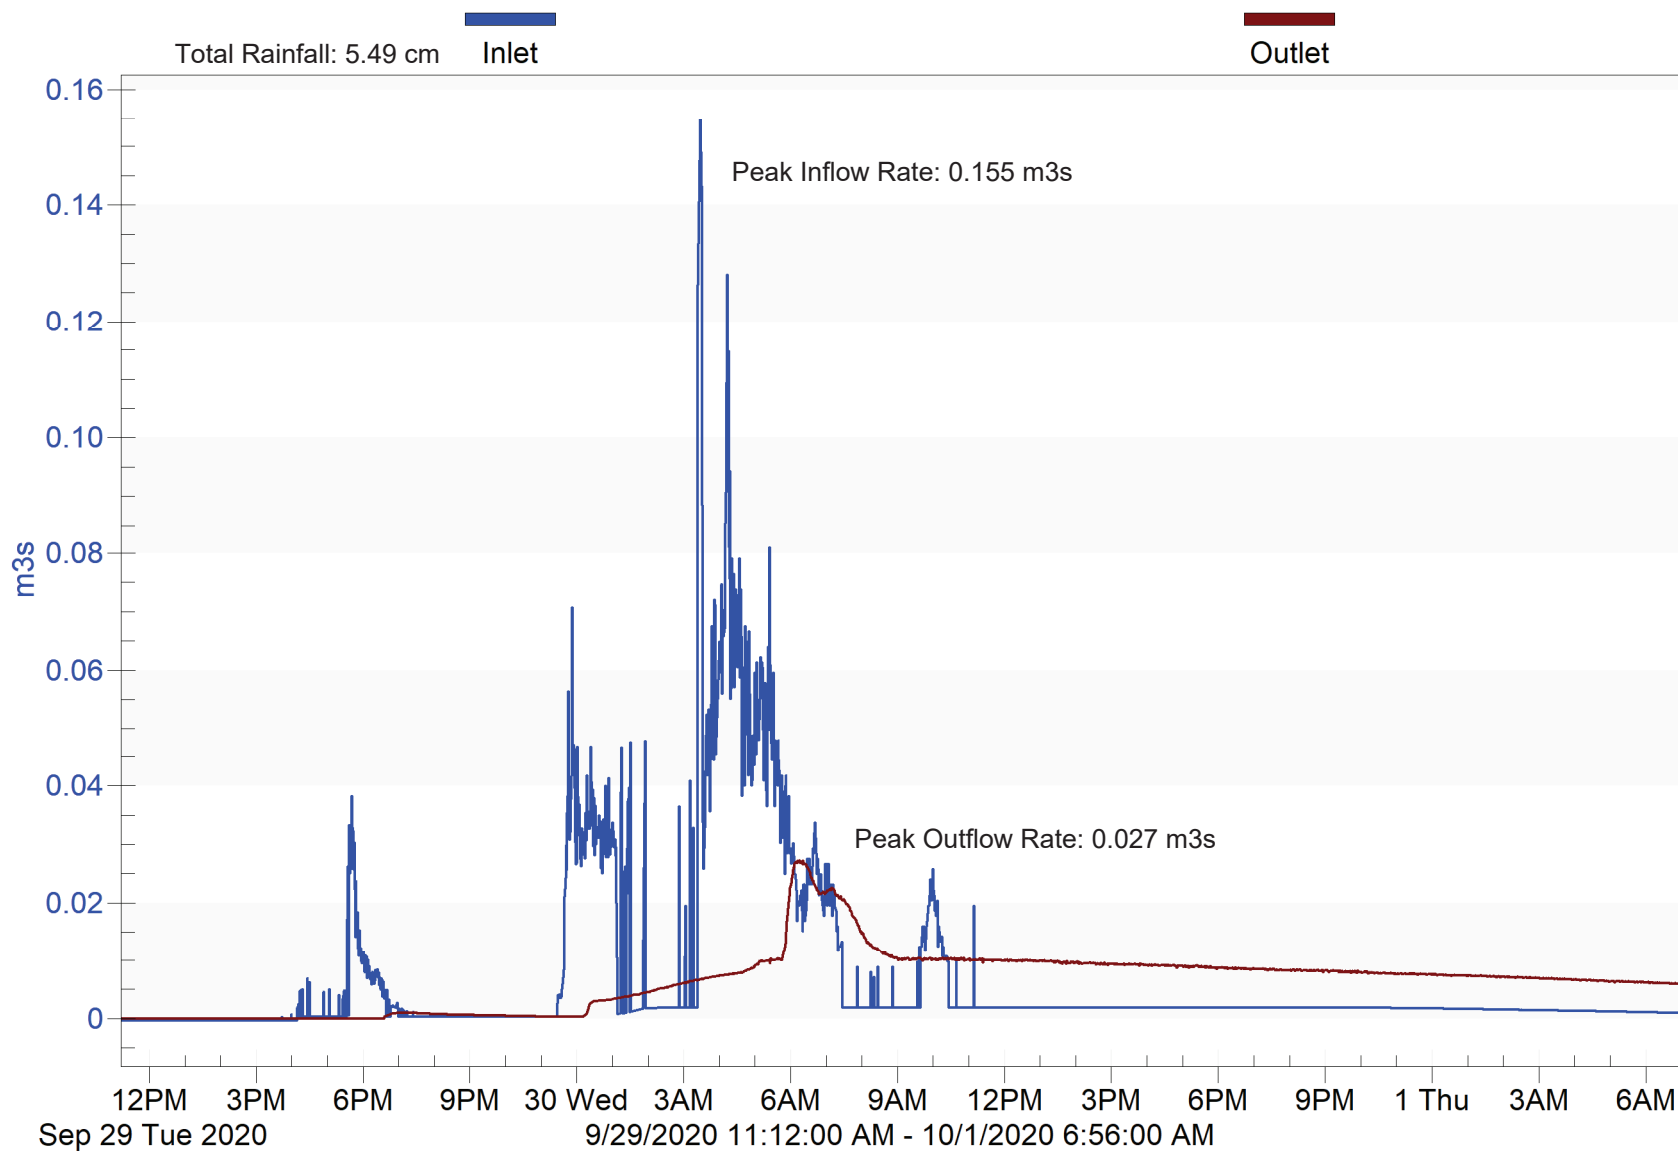

# Storm 12

Kennedy Drive Wetland

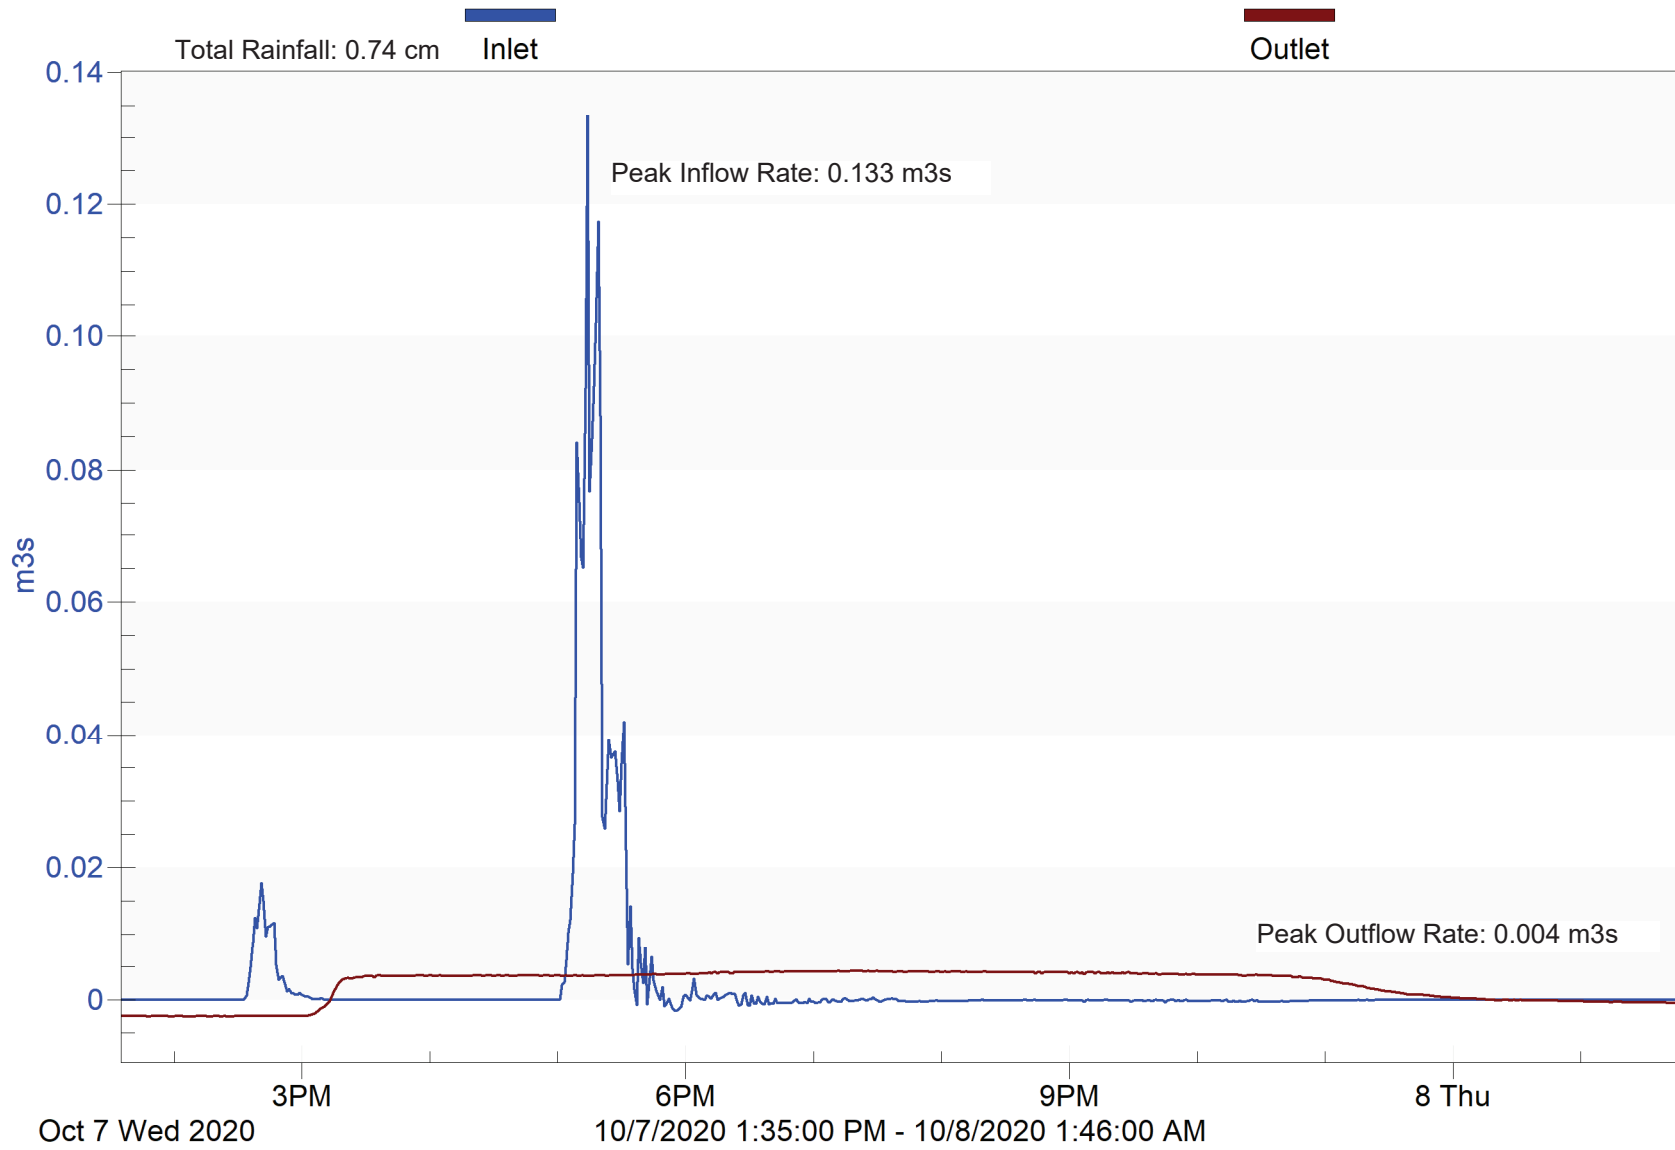

# Storm 14

Kennedy Drive Wetland

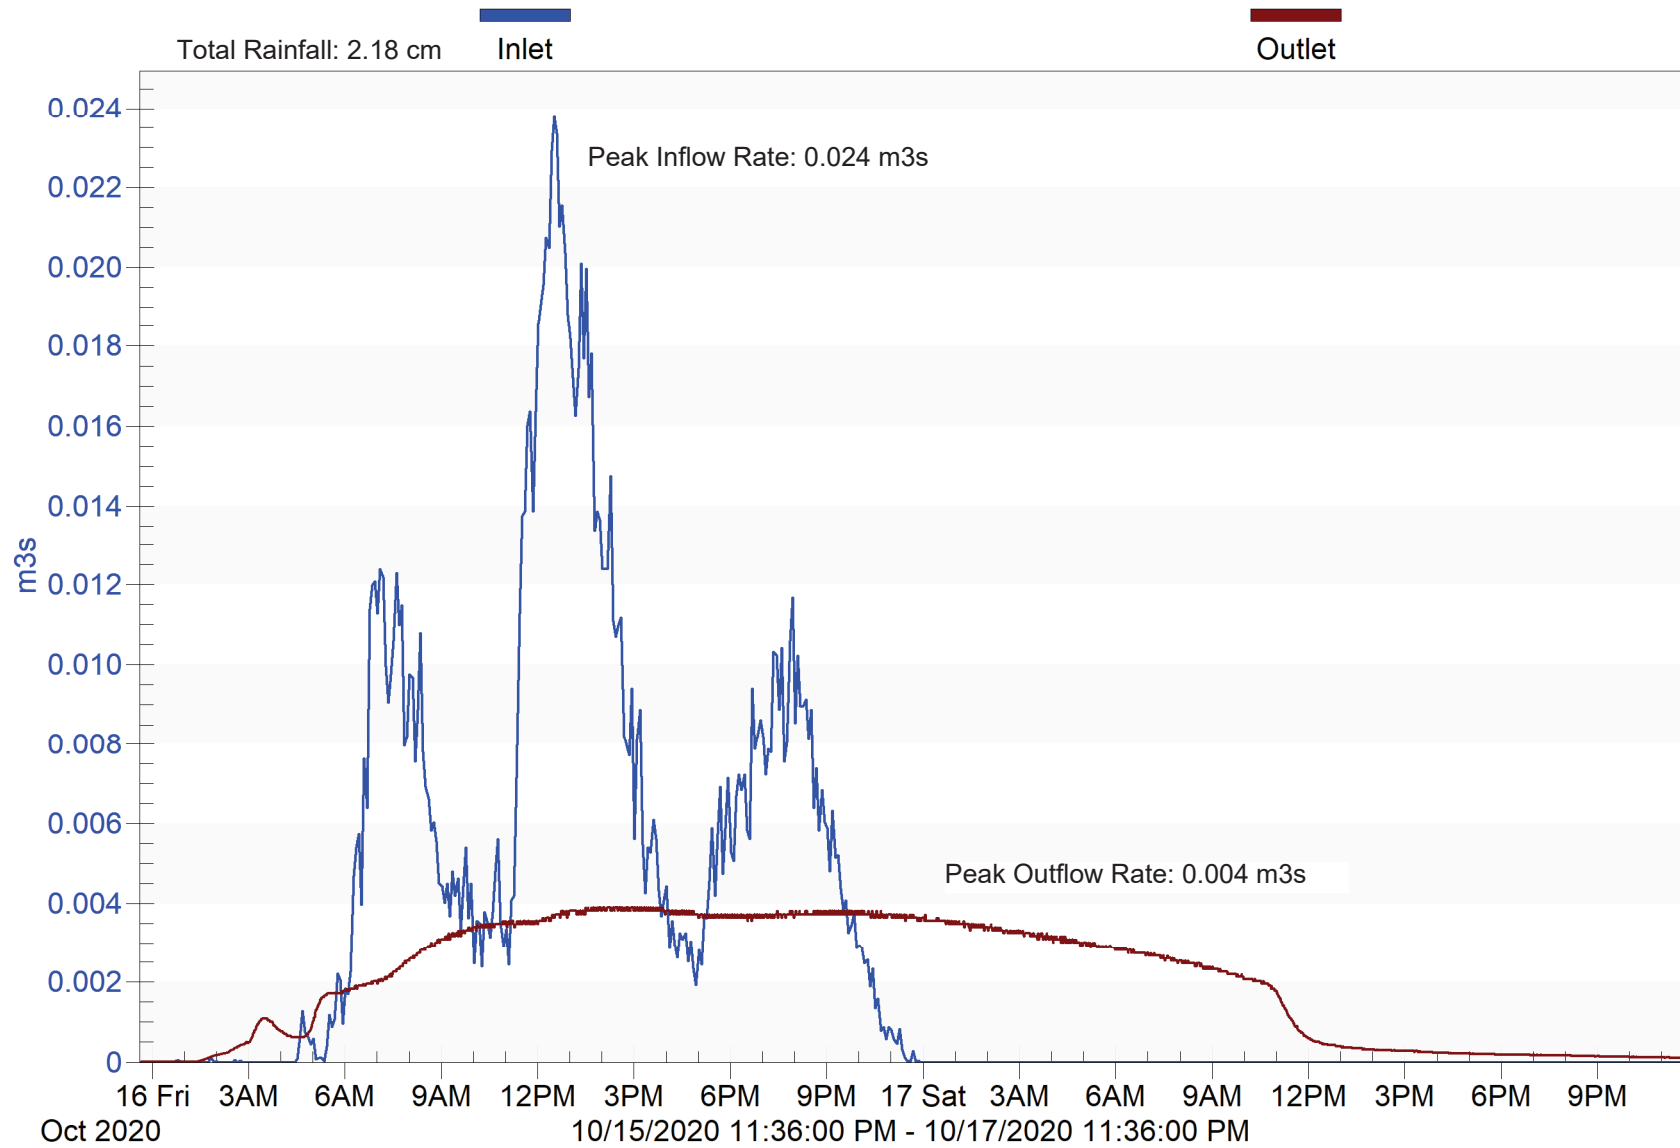

# Storm 15

Kennedy Drive Wetland

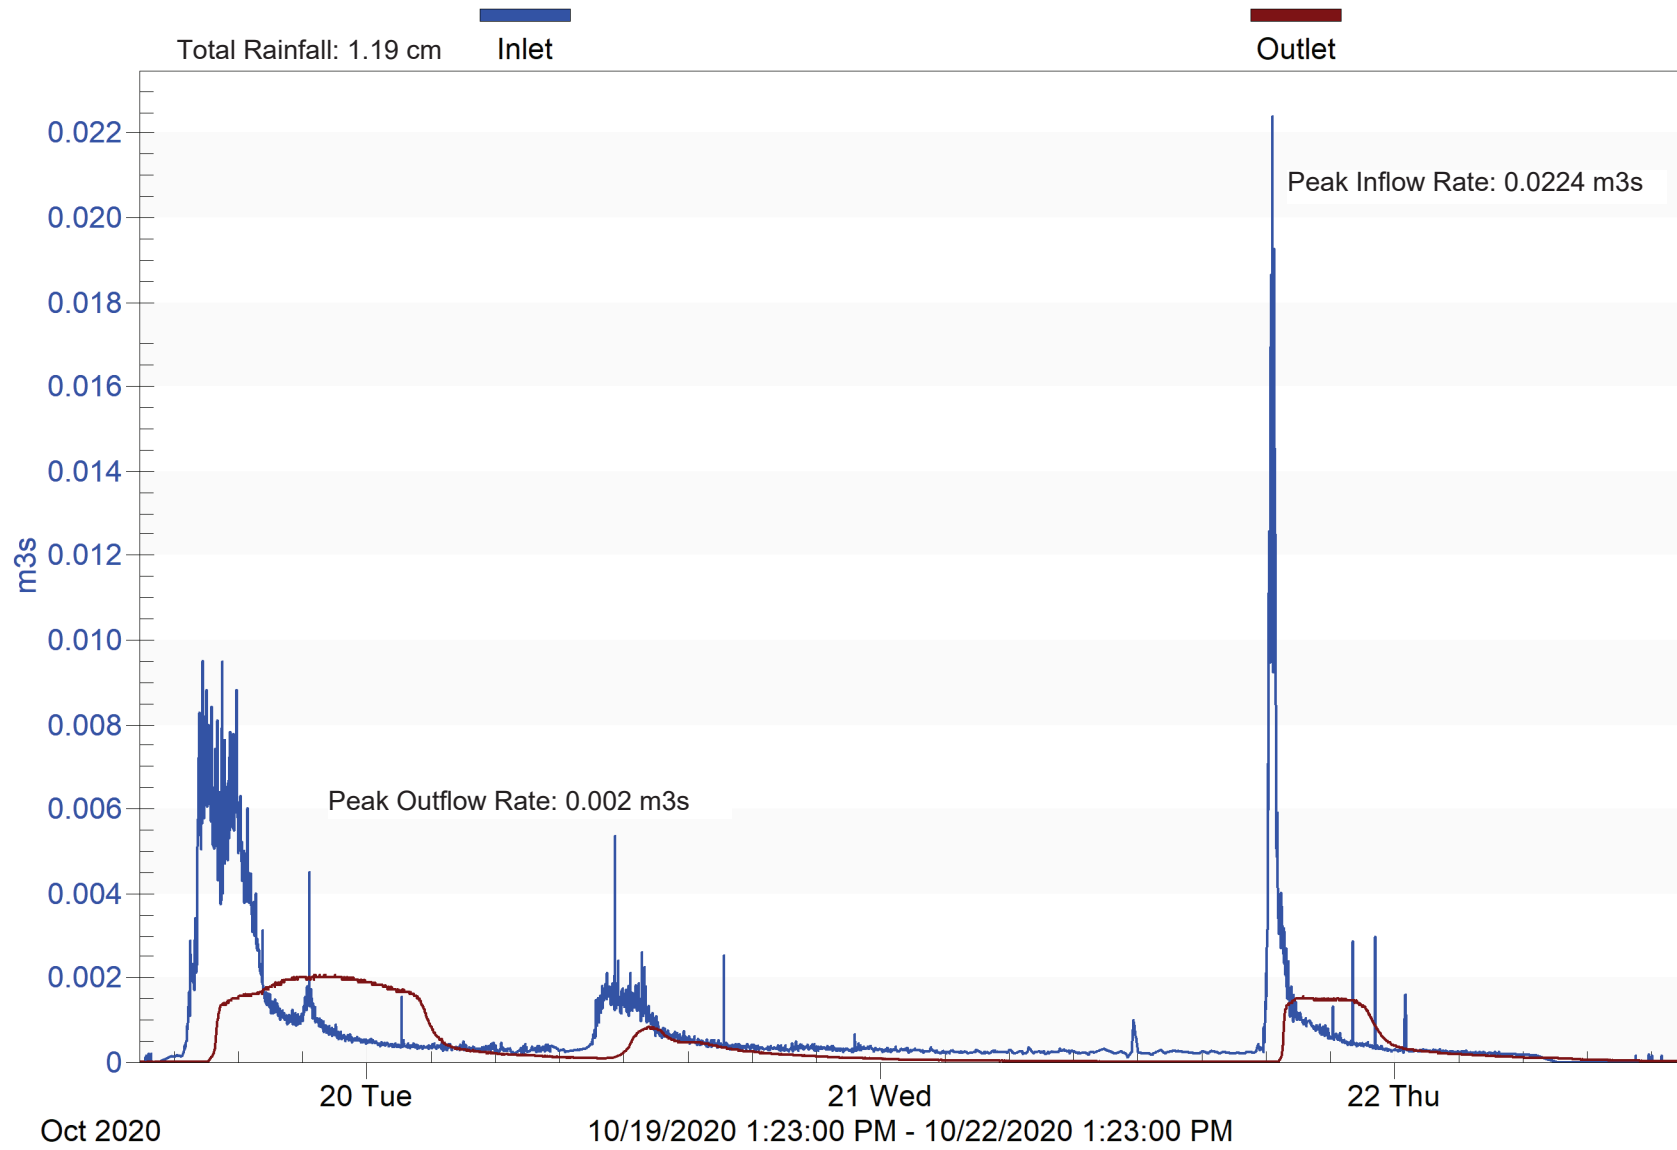

# Storm 3

Kennedy Drive Wetland

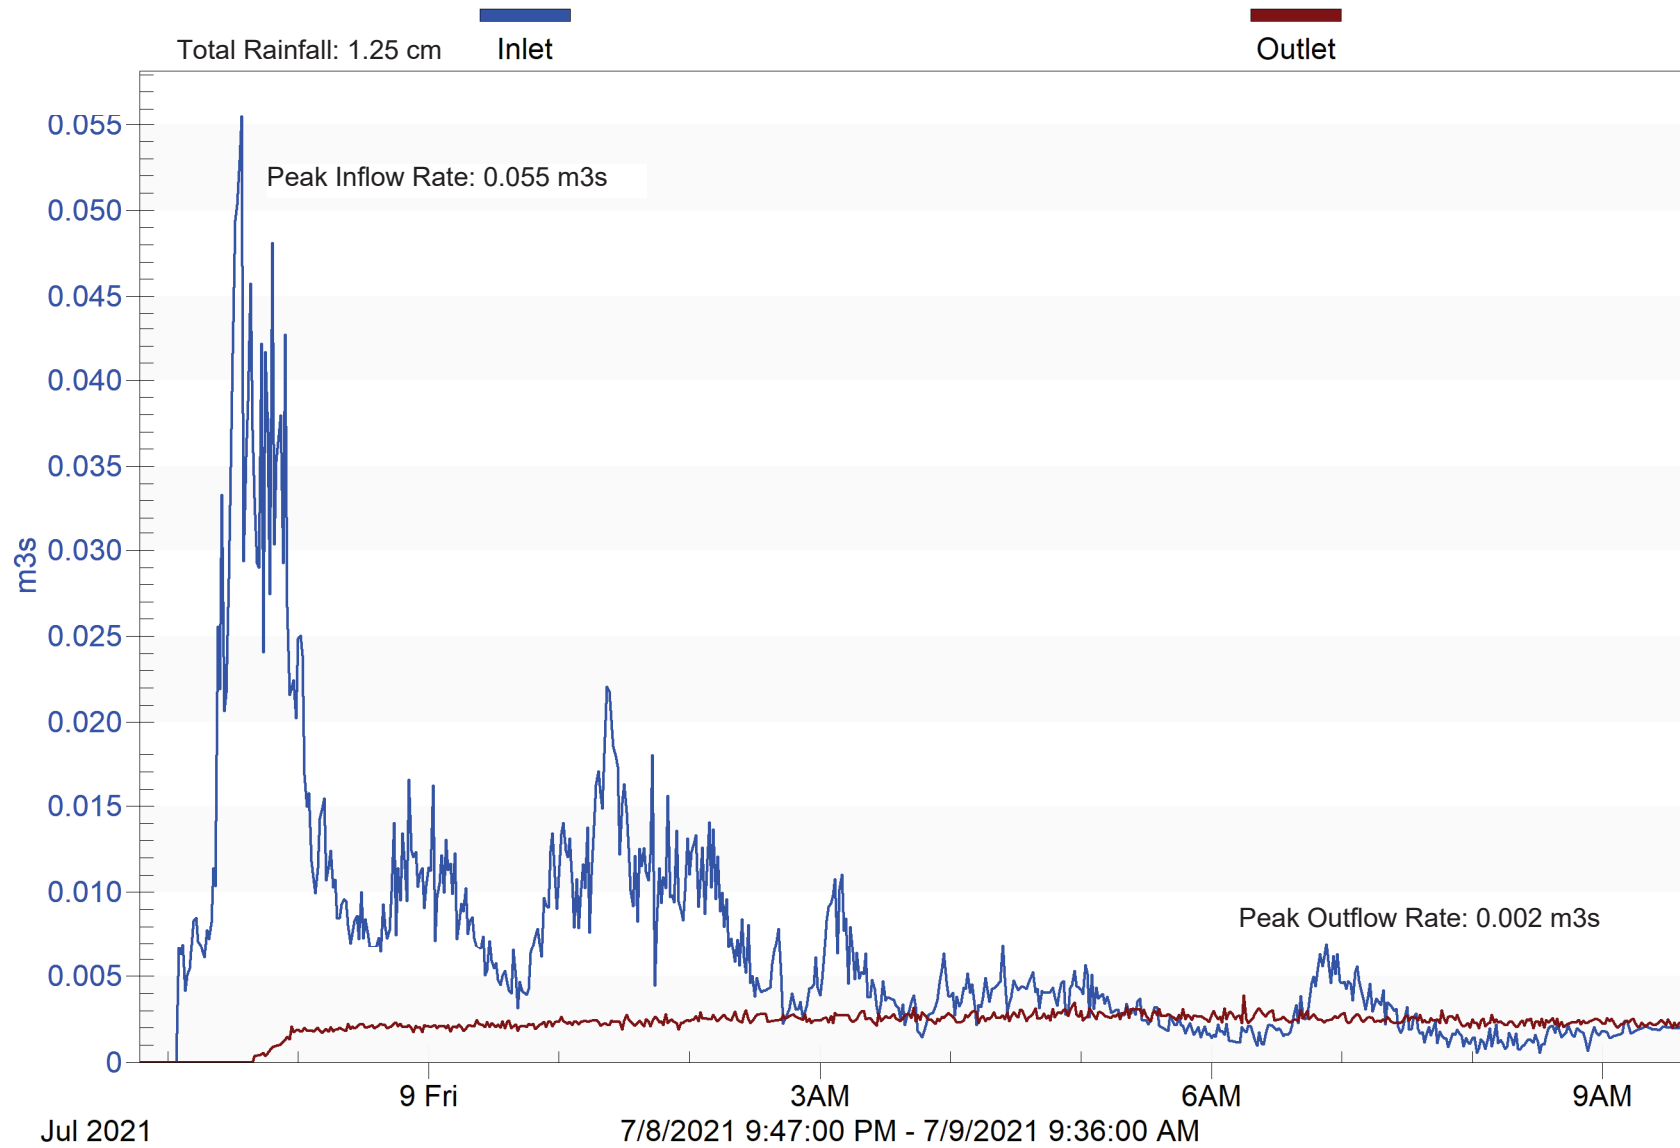

# Storm 4

Kennedy Drive Wetland

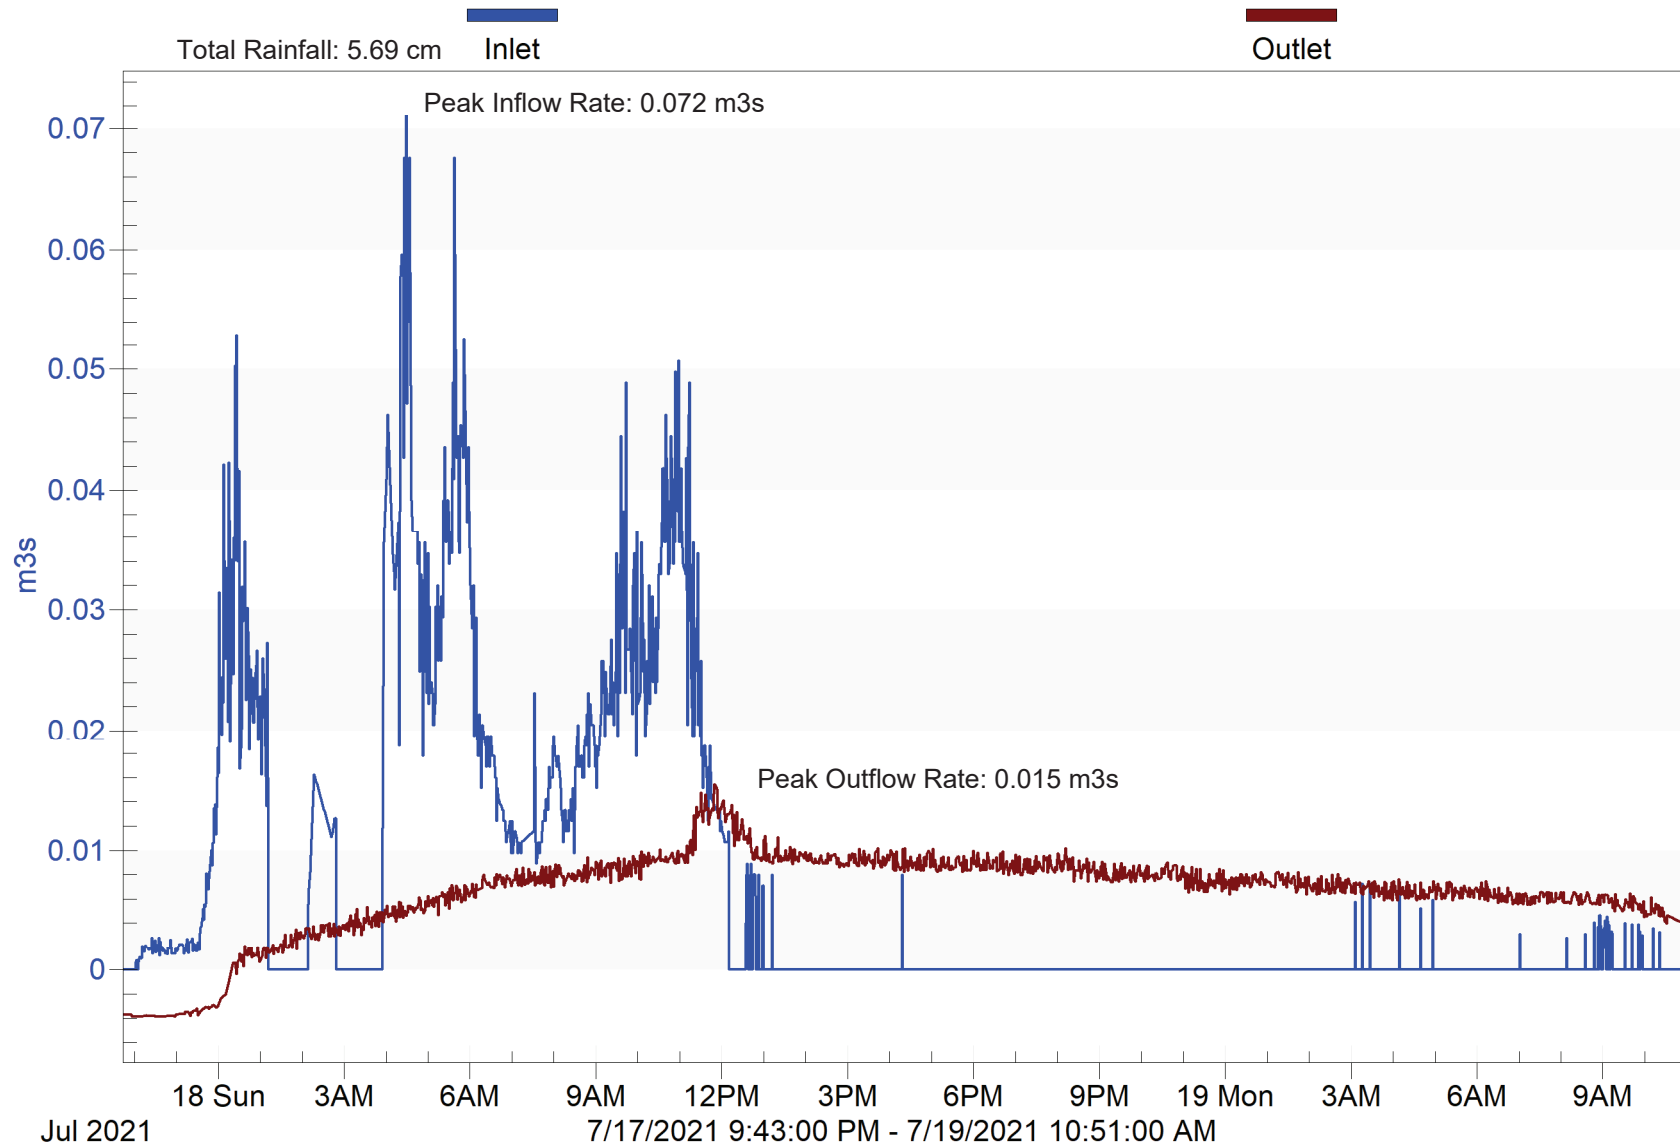

# Storm 5

Kennedy Drive Wetland

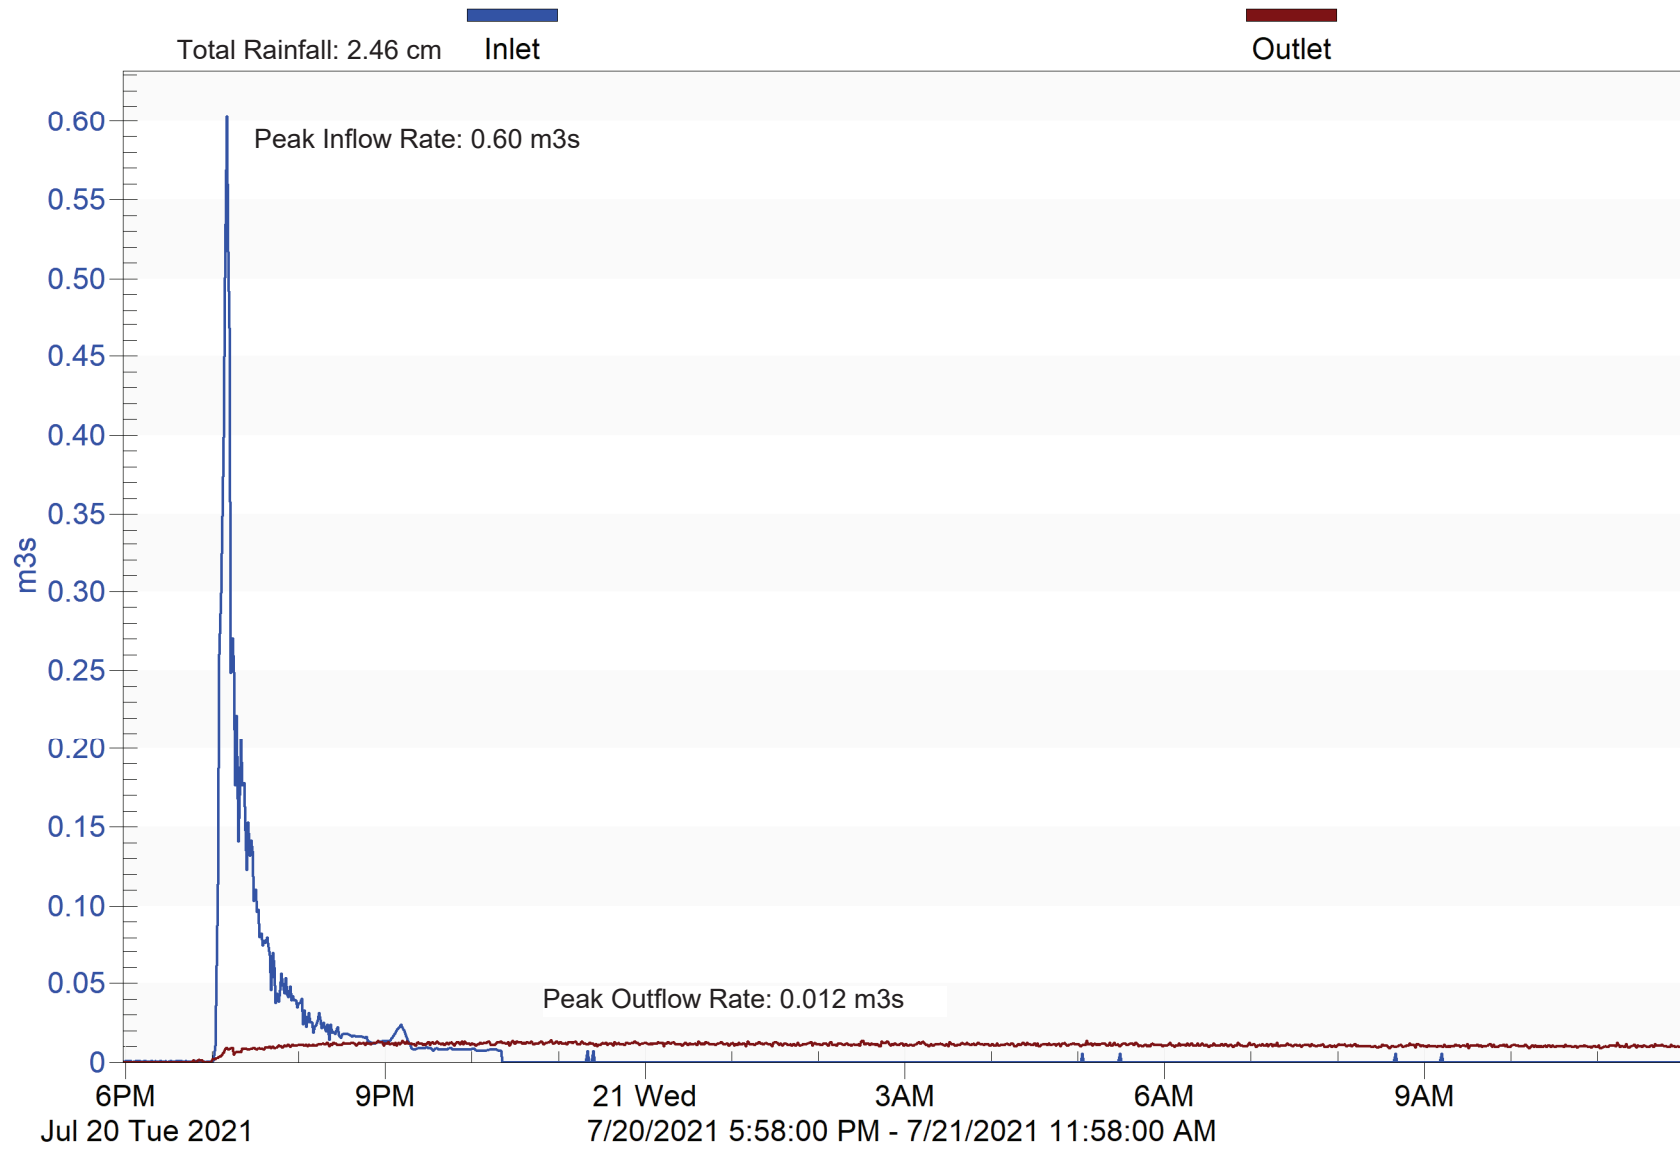

# Storm 6

Kennedy Drive Wetland

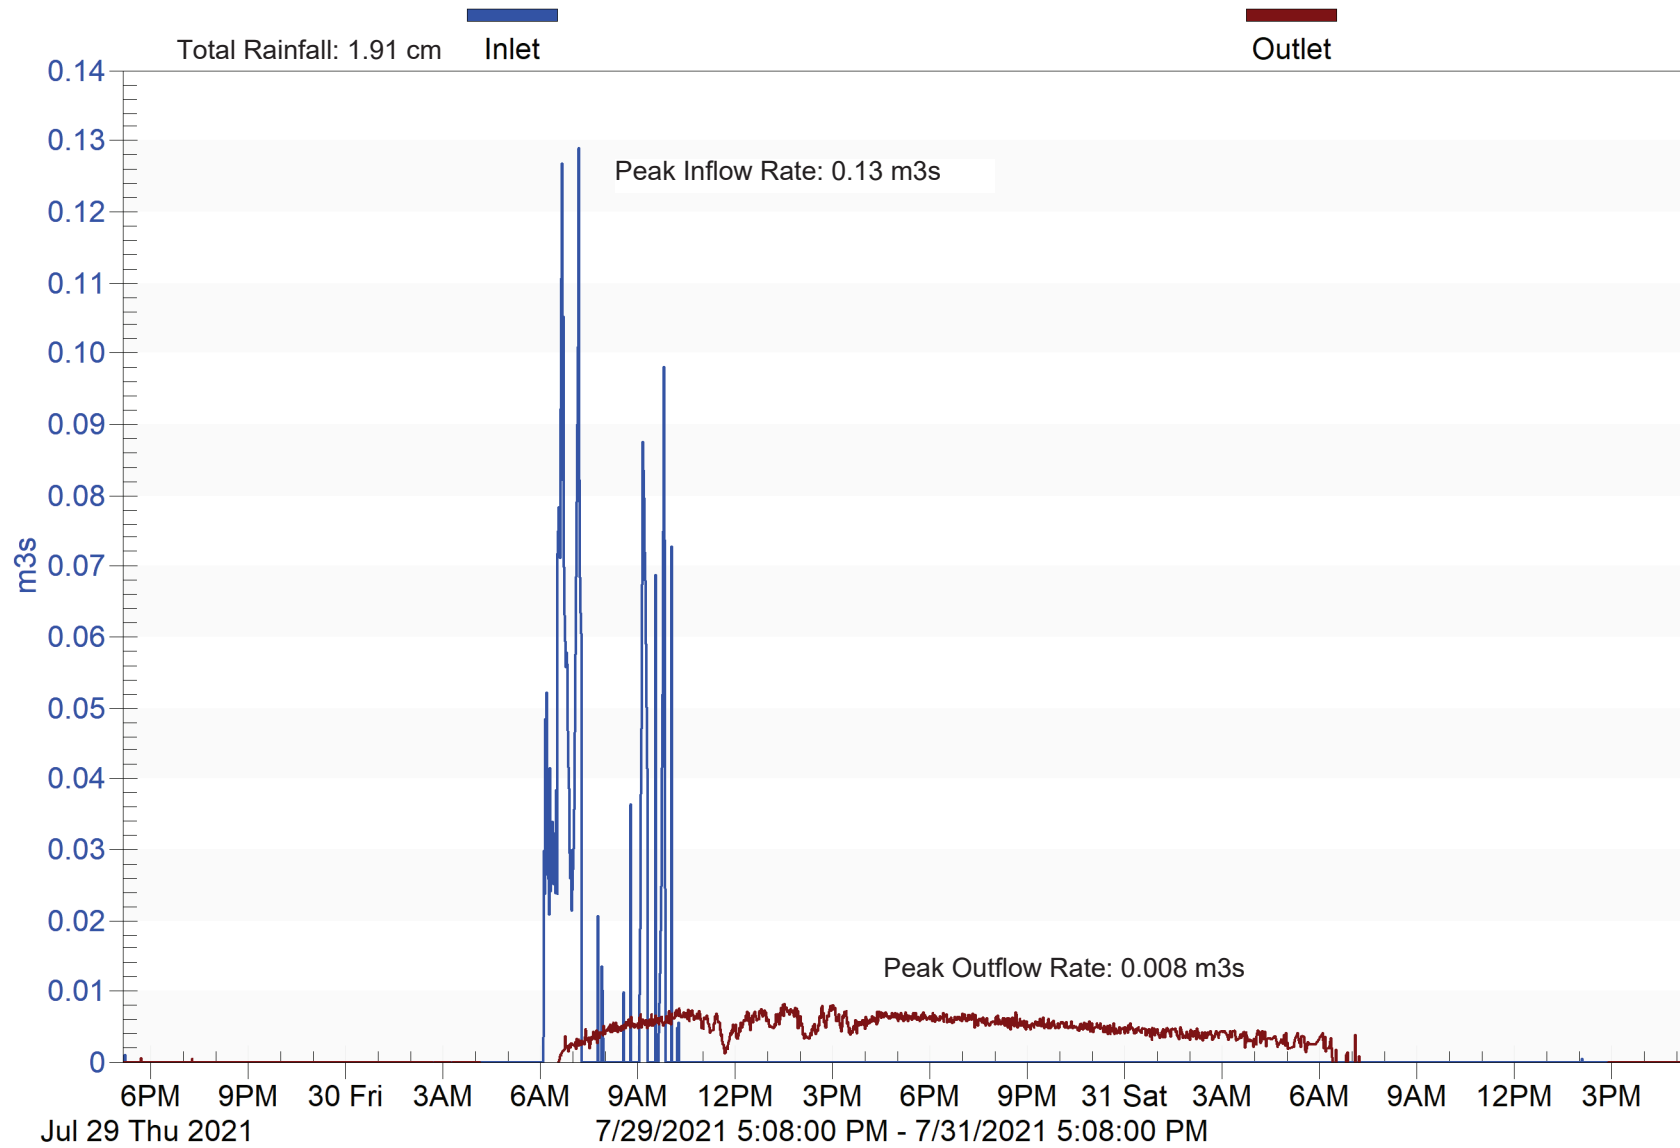



# Storm 7

Kennedy Drive Wetland

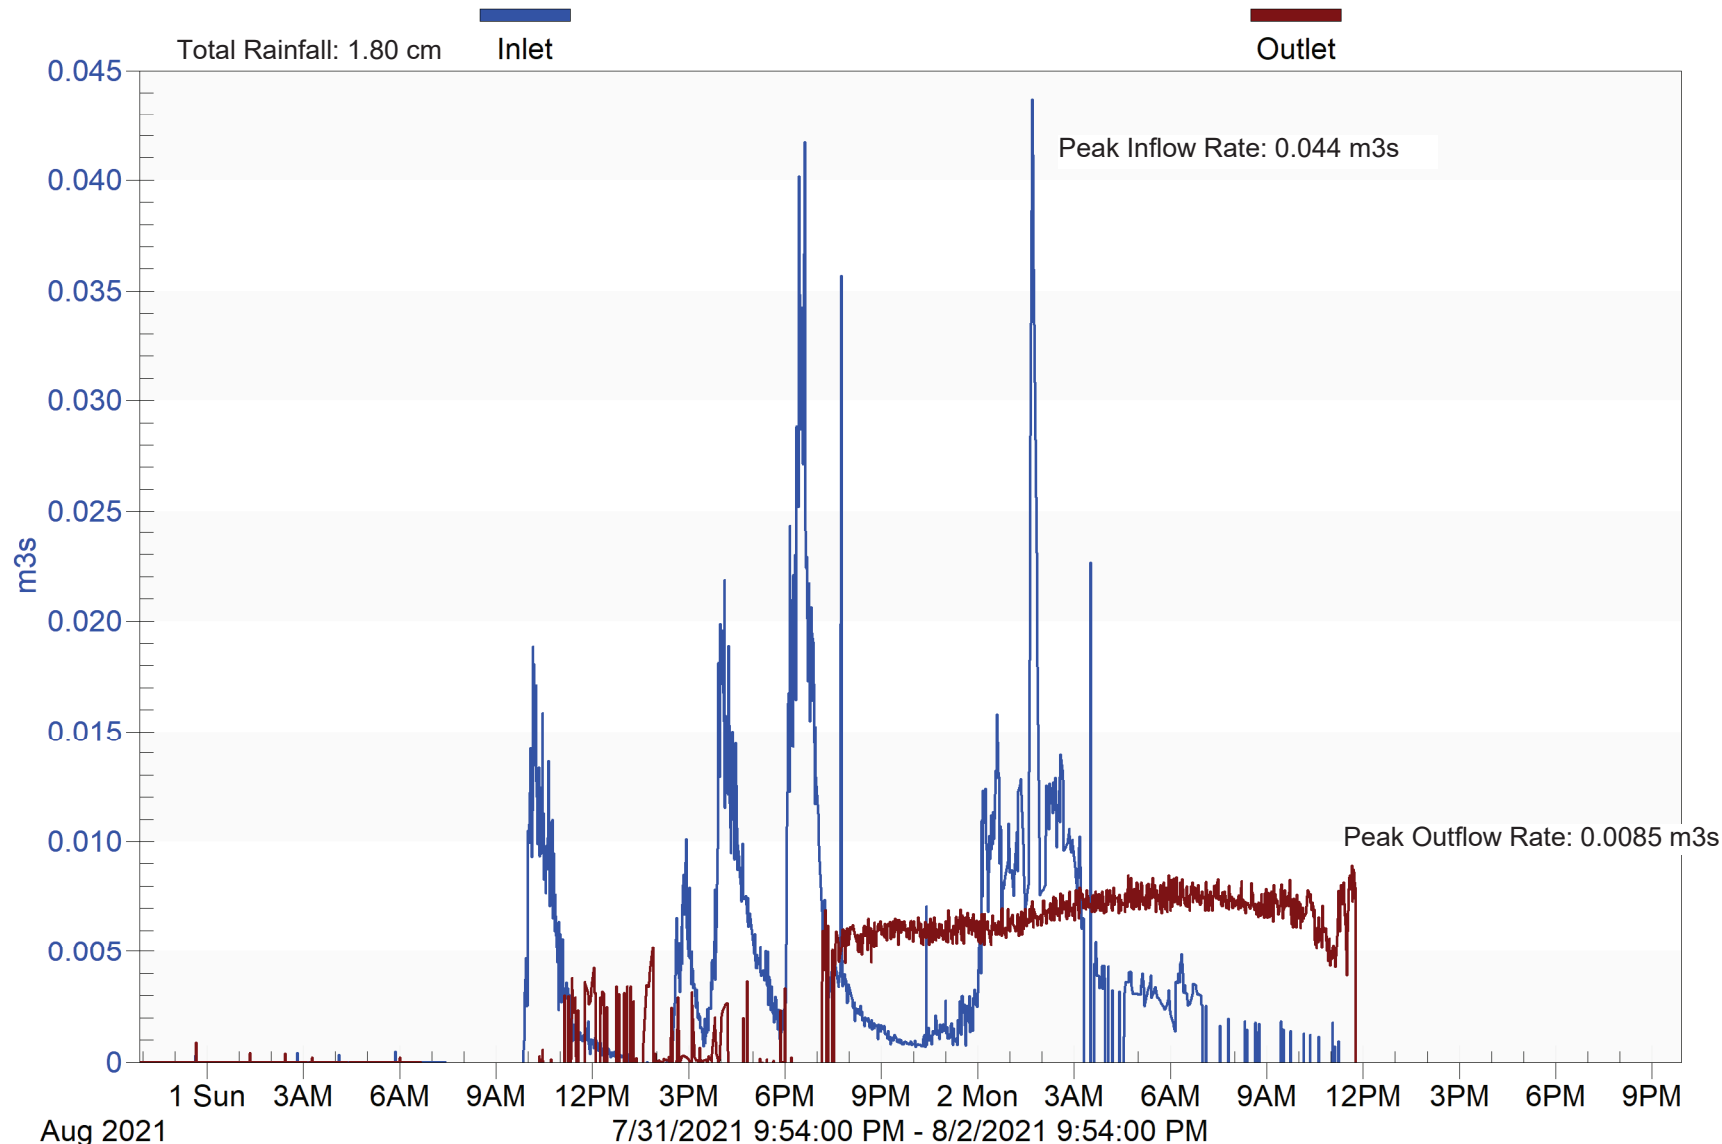

# Storm 8

Kennedy Drive Wetland

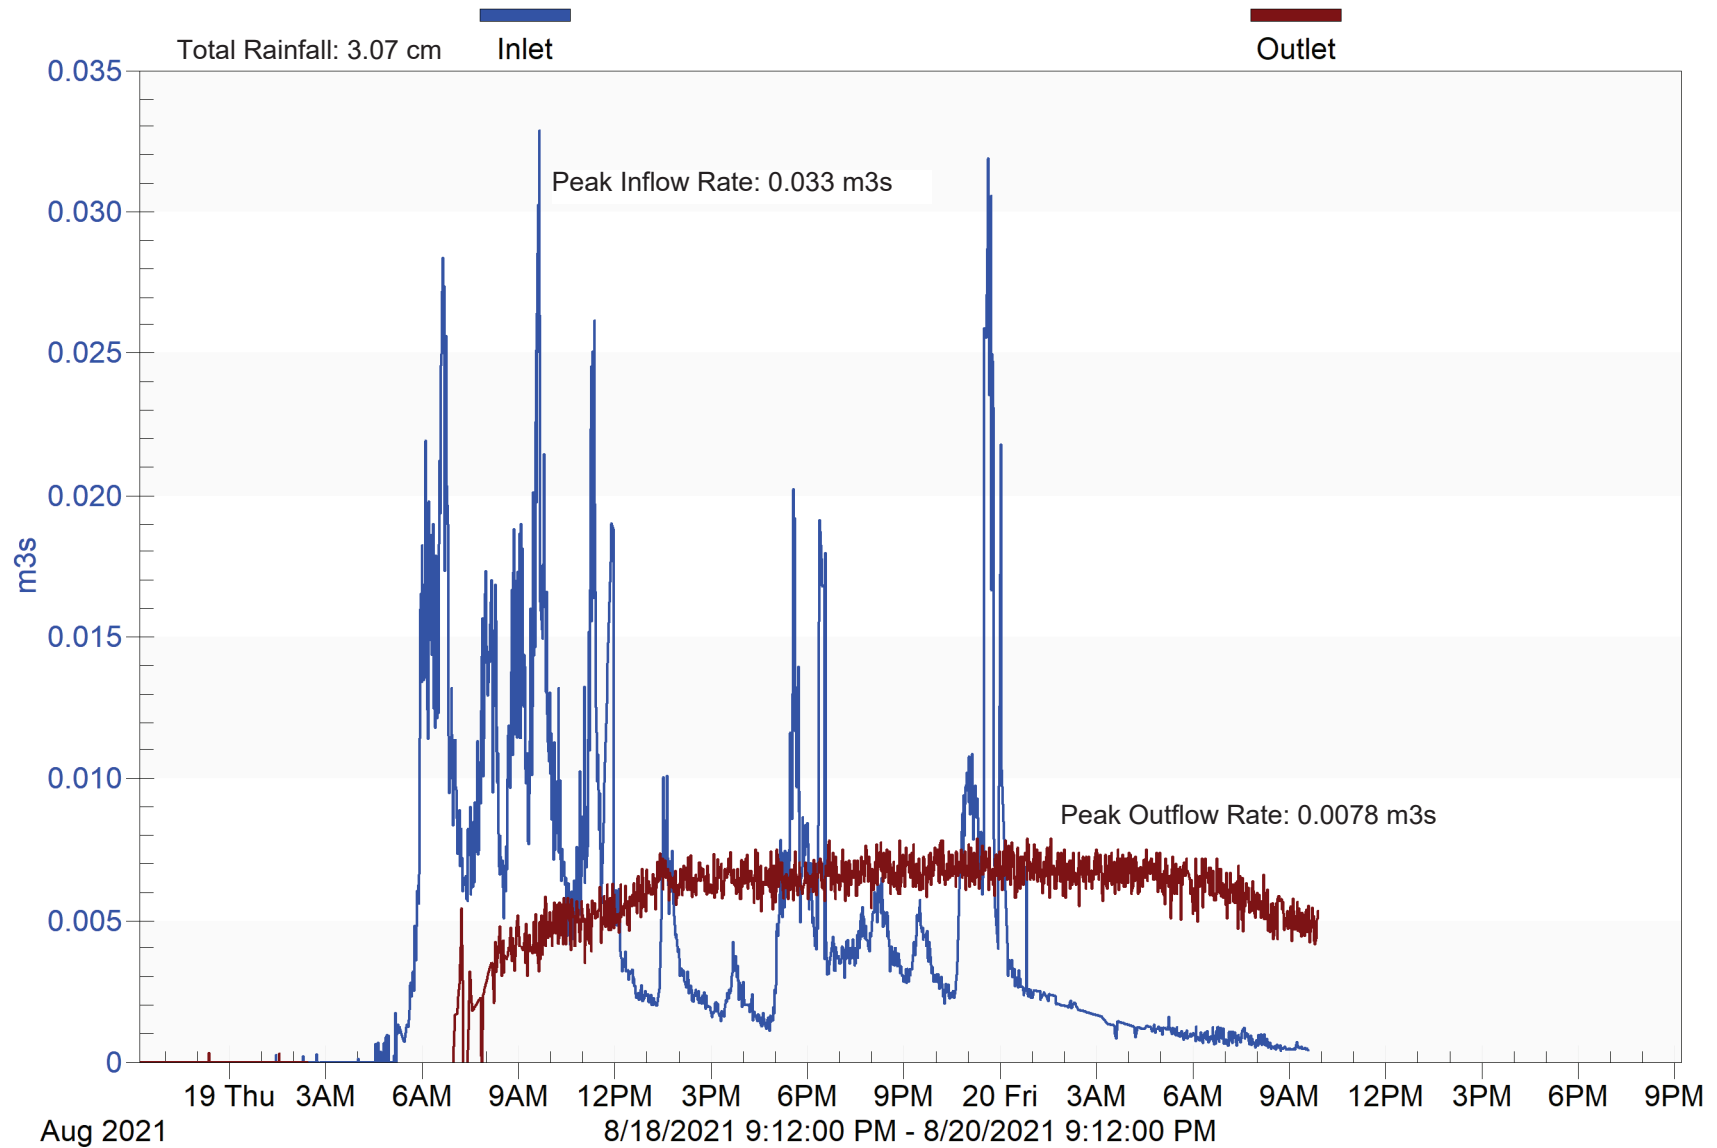

# Storm 9

Kennedy Drive Wetland

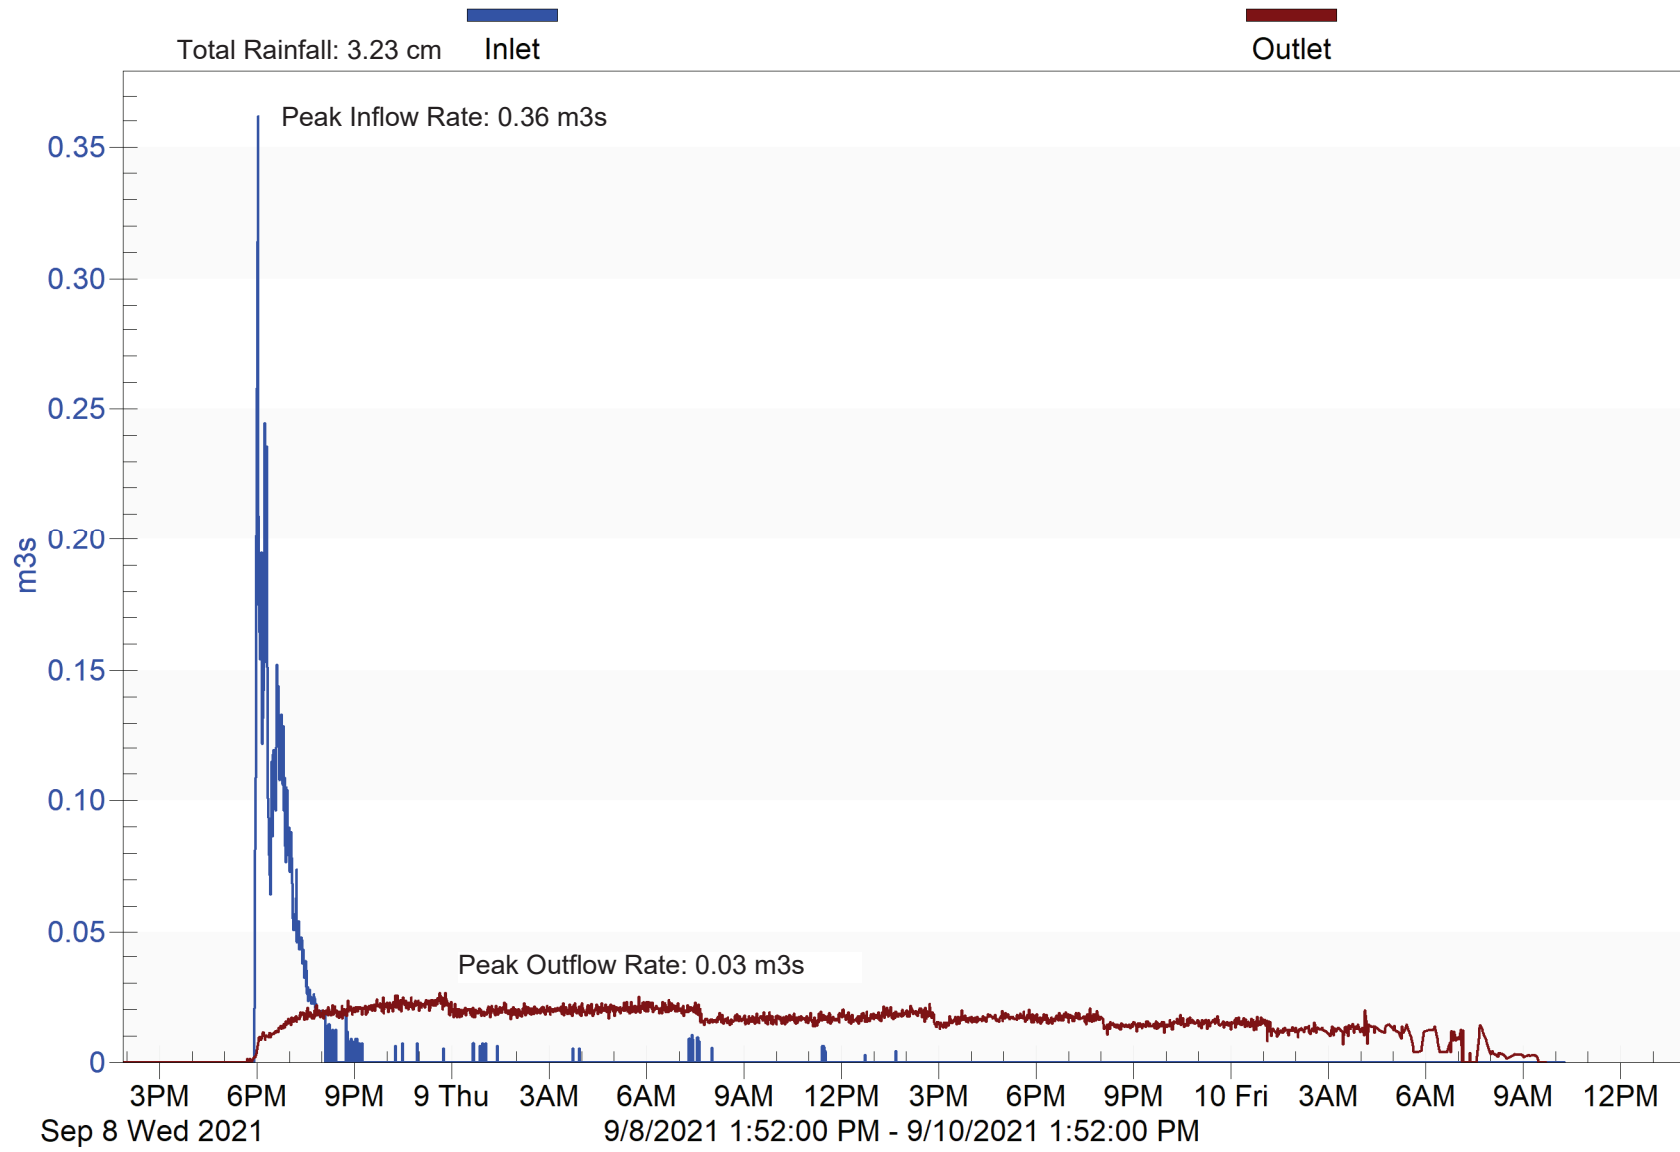

# Storm 10

Kennedy Drive Wetland

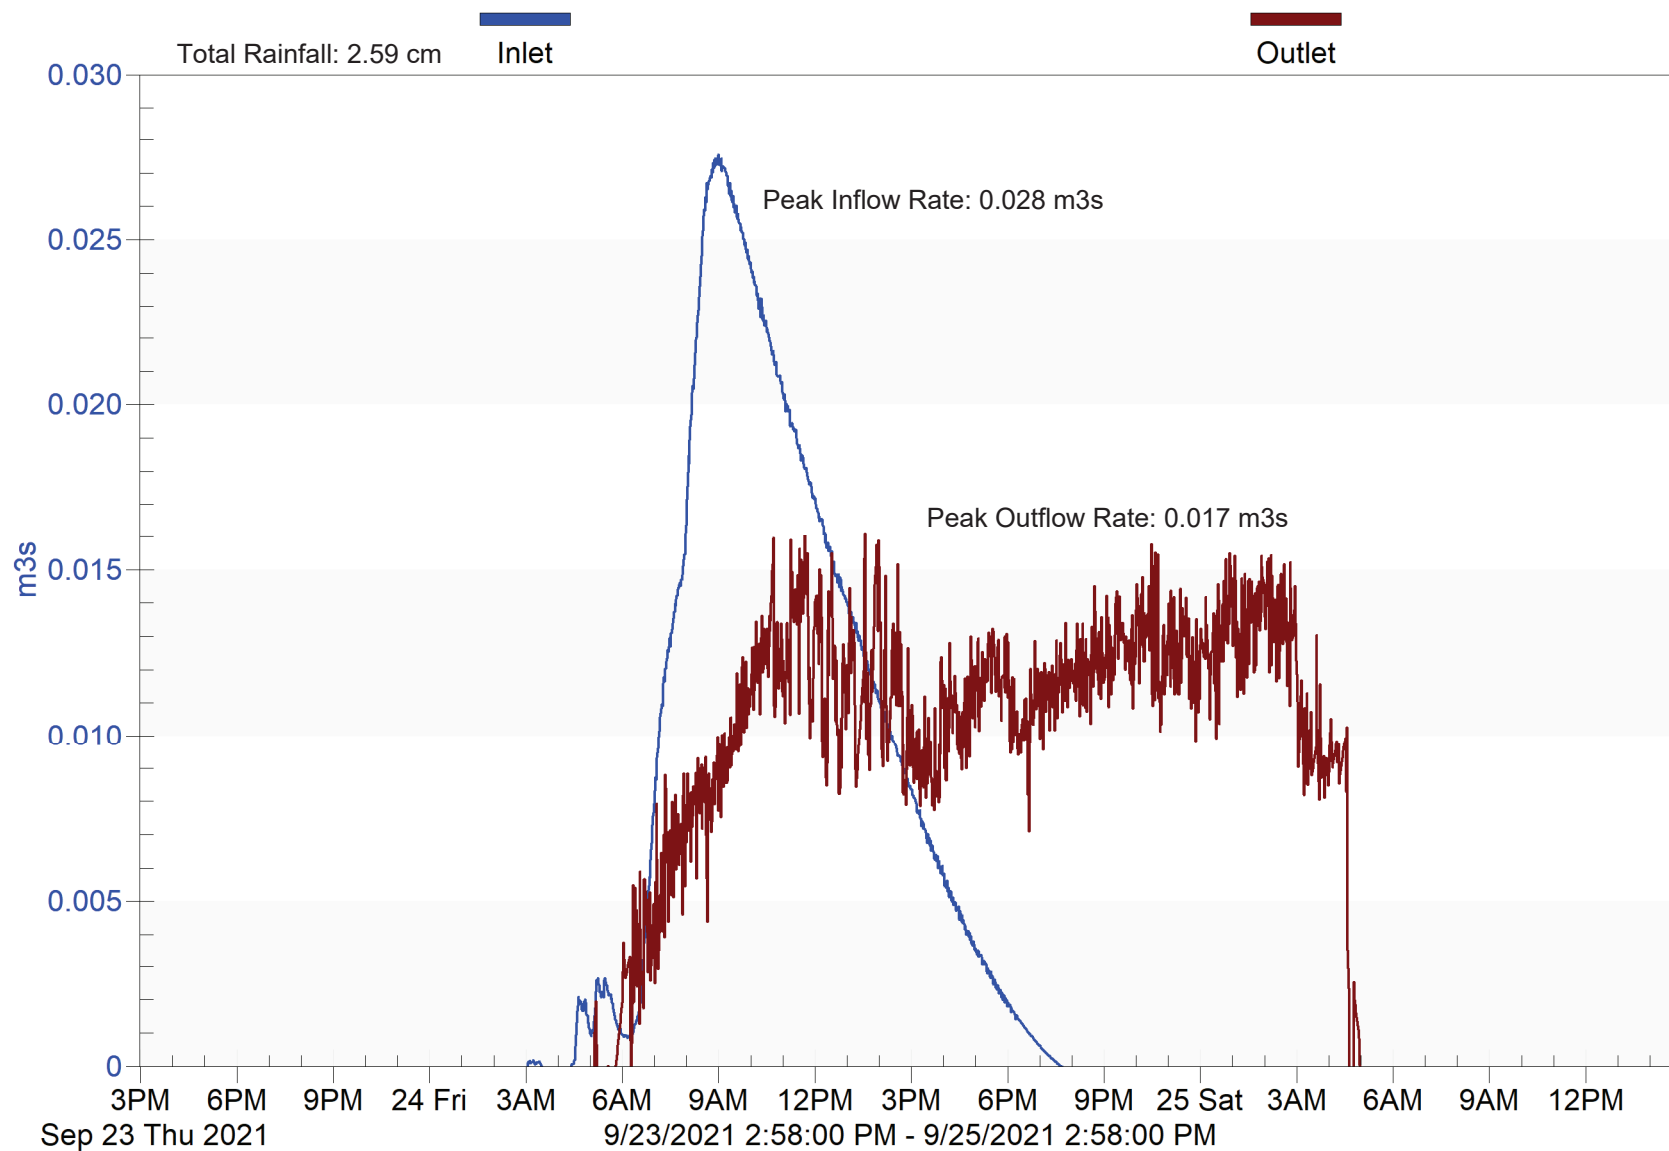

Supplement: d3ew00062a1.pdf [file d3ew00062a1.pdf]
